# Supplementary material for: Albian to Turonian agglutinated foraminiferal assemblages of the Lower Saxony Cretaceous sub-basins – implications for sequence stratigraphy and paleoenvironmental interpretation
Source: Copernicus journal article supplement (doi:10.5194/fr-24-395-2021), 2021-12-17
Supplement: Supplementary file 1 [file table S1.xlsx]

## Sheet: Wunstorf cores isotopes
Wunstorf cores isotopes
Wu 2010/4	VPDB	VSMOW	VPDB
depth in m	mw δ13C	mw δ18O	mw δ18O	stddev δ18O	stdev δ13C
35.2	2.522	27.7893	-2.98435	0.159077	0.0775048
36.2	2.49733	27.712	-3.05936	0.146366	0.180112
37.15	2.6695	27.7213	-3.05039	0.14414	0.106027
38.2	2.4025	27.9185	-2.85906	0.0846424	0.113259
39.3	2.53875	27.526	-3.23978	0.157239	0.120109
40.3	2.67067	27.1022	-3.65082	0.179407	0.120571
41.3	2.61925	27.5227	-3.24301	0.15908	0.135706
42.2	2.705	27.0787	-3.67369	0.139228	0.14828
43.3	2.1625	27.277	-3.48131	0.104867	0.0886096
44.2	2.57767	27.305	-3.45415	0.117286	0.172123
45.3	2.376	27.9737	-2.80554	0.16398	0.0958958
46.2	2.63267	27.6407	-3.12855	0.128422	0.0308599
47.25	2.601	27.1822	-3.57322	0.161846	0.163686
48.2	2.527	27.035	-3.71605	0.0787528	0.0775403
49.15	2.83475	27.0988	-3.65421	0.170103	0.0956813
49.7	2.93567	27.74	-3.0322	0.109914	0.110961
51.5	2.95575	27.8105	-2.96382	0.150445	0.0860015
52.25	2.87725	27.1607	-3.59415	0.153871	0.0997543
53.15	3.12175	27.3295	-3.43038	0.106347	0.0965794
54.15	3.57325	28.4803	-2.31408	0.101283	0.173058
55.3	3.3415	27.0765	-3.6758	0.139067	0.0510065
56.3	3.427	27.426	-3.33678	0.168489	0.120153
57.25	3.31075	26.7798	-3.96364	0.126697	0.10149
58.6	3.3436	27.2542	-3.50343	0.0881969	0.100883
59.75	3.37825	27.1148	-3.63869	0.133662	0.139416
60.25	3.39733	27.0937	-3.65914	0.180101	0.0963656
61.2	3.30375	27.0773	-3.67499	0.137311	0.109892
62.2	3.2355	27.063	-3.68889	0.0650538	0.0586899
63.15	3.24125	27.027	-3.72381	0.0946837	0.110019
64.1	3.264	27.0185	-3.73206	0.134909	0.119791
65.1	3.541	27.3055	-3.45367	0.176746	0.146417
66.3	3.652	27.158	-3.59674	0.200749	0.148714
67.15	3.25633	26.0695	-4.65259	0.0629325	0.135884
68.1	3.0926	26.553	-4.18359	0.104319	0.0953745
69.15	3.6665	26.6795	-4.06089	0.0700036	0.120915
70.2	3.07475	26.5845	-4.15303	0.146421	0.135561
71.25	3.51233	26.8763	-3.86996	0.129662	0.0464901
72.9	3.04033	26.6683	-4.07172	0.136537	0.145211
73.55	3.2884	27.3393	-3.42085	0.102481	0.0887654
74.6	3.68	26.9267	-3.82113	0.22426	0.175077
75.3	3.02833	27.1247	-3.62907	0.10929	0.0421228
76.3	3.54167	27.7143	-3.0571	0.115106	0.144531
77.55	3.65467	27.5757	-3.1916	0.251198	0.150699
78.5	3.5972	27.006	-3.74418	0.0876499	0.0936253
79.4	4.33267	27.4777	-3.28666	0.18609	0.144918
80.3	4.849	27.9733	-2.80587	0.131538	0.156815
81.4	3.30067	28.0047	-2.77547	0.133979	0.120442
82.15	3.04767	28.132	-2.65196	0.185599	0.125484
83	3.0914	27.7214	-3.05024	0.036828	0.0622037
84	2.92225	27.3417	-3.41858	0.135784	0.0980455
84.75	3.032	27.1737	-3.58154	0.157052	0.0676387
85.8	3.131	27.6667	-3.10333	0.100201	0.0226495
Wu 2010/3	VPDB	VSMOW	VPDB
depth in m	mw δ13C	mw δ18O	mw δ18O	stddev δ18O	stdev δ13C
9	2.05133	27.9078	-2.86948	0.150442	0.12933
10.2	1.9164	27.7388	-3.03336	0.0951746	0.102807
11.05	1.955	27.8053	-2.96883	0.134106	0.0815475
12.2	2.05433	27.555	-3.21165	0.106888	0.0830803
13.2	1.8832	27.536	-3.23008	0.113552	0.0706307
14.2	1.983	27.639	-3.13017	0.146899	0.127823
15.4	1.6898	27.9156	-2.86187	0.072937	0.0760901
16.3	1.852	27.989	-2.79067	0.152563	0.0213776
17.1	2.26467	27.7543	-3.0183	0.0882345	0.108487
18.2	2.21575	27.6913	-3.07949	0.191855	0.168573
19.2	1.902	28.3447	-2.44567	0.0756593	0.137197
20.35	1.92275	28.0425	-2.73878	0.0950421	0.106934
21.2	2.11425	27.44	-3.3232	0.0391535	0.0683831
22.3	2.20625	27.596	-3.17188	0.0897051	0.0604559
23.25	2.25467	27.7953	-2.97853	0.0769177	0.0825611
24.25	2.2655	27.454	-3.30962	0.149695	0.135613
25	2.17267	27.617	-3.15151	0.129108	0.138742
25.25	2.1856	28.1965	-2.5894	0.0819939	0.0958608
26.25	2.124	27.703	-3.06809	0.128137	0.0859826
27.3	2.313	28.0207	-2.75995	0.169359	0.107387
28.3	2.18625	27.658	-3.11174	0.0684617	0.10097
29.15	2.05725	27.2752	-3.48301	0.0720203	0.110349
30.15	2.2148	27.7883	-2.9854	0.0736269	0.0799981
31.35	2.1494	27.5047	-3.26047	0.0396274	0.0778672
32	2.119	27.3403	-3.41996	0.0979128	0.0720509
33.4	2.254	27.738	-3.03414	0.102455	0.0538609
34.2	2.3185	27.565	-3.20195	0.160717	0.124538
35.2	2.08775	27.9624	-2.81647	0.0817331	0.100729
36.3	2.217	27.965	-2.81395	0.148688	0.134119
37.35	2.22875	27.5703	-3.19678	0.0820508	0.0934394
38.2	2.044	27.347	-3.41341	0.140268	0.100409
39.15	2.19075	27.5613	-3.20551	0.0963397	0.0920267
40.15	2.1848	27.7198	-3.05179	0.0745667	0.0983753
41.2	2.16867	27.5677	-3.19936	0.0775973	0.044456
42.25	2.09	27.4758	-3.28852	0.135598	0.0992035
43.25	1.99775	27.4737	-3.29054	0.135153	0.100619
44	2.0388	27.588	-3.17964	0.142068	0.0807199
45	2.08725	27.7868	-2.98685	0.126587	0.0984289
46	2.25467	27.4827	-3.28181	0.138753	0.117781
47.05	2.17367	27.5917	-3.17608	0.13502	0.101791
48.05	2.12533	28.1377	-2.64646	0.159889	0.116475
48.9	2.11925	27.435	-3.32805	0.172534	0.0796299
49.65	2.0528	27.7248	-3.04694	0.102602	0.100775
50.8	2.05625	27.656	-3.11368	0.133604	0.0846222
51.85	2.08667	27.784	-2.98952	0.0678823	0.0860484
52.85	2.0175	27.6818	-3.0887	0.0913286	0.108694
53.85	2.08	27.9613	-2.81751	0.11767	0.112468
55.25	1.9608	27.9144	-2.86303	0.0933933	0.0946874
55.95	2.005	27.8967	-2.88023	0.0349476	0.102193
57	1.9825	27.9967	-2.78323	0.151925	0.104302
58	2.01275	27.696	-3.07488	0.12085	0.132069
59.05	2.0635	27.8103	-2.96398	0.129894	0.100693
60	2.02575	27.8373	-2.93787	0.0867078	0.0905037
61.05	2.12933	27.809	-2.96527	0.135841	0.0678405
62	2.239	27.709	-3.06227	0.0438406	0.114333
63.05	2.299	27.813	-2.96139	0.121565	0.105559
64.05	2.326	28.036	-2.74508	0.0600583	0.137203
65.3	2.0892	27.8056	-2.96857	0.0436612	0.079616
66.3	2.24	27.97	-2.8091	0.153088	0.0797935
67.1	2.17575	27.7015	-3.06954	0.129544	0.100851
68.05	1.99967	27.6877	-3.08296	0.157361	0.152553
68.8	2.04175	28.233	-2.55399	0.170863	0.093082
70.5	1.9732	27.8242	-2.95053	0.0759289	0.0780686
Wu 2010/1	VPDB	VSMOW	VPDB
depth in m	mw δ13C	mw δ18O	mw δ18O	stddev δ18O	stdev δ13C
15.2	2	27.535	-3.23105	0.0705337	0.120455
16.3	2.156	27.7357	-3.03632	0.132563	0.11583
17.3	2.09175	27.809	-2.96527	0.184643	0.127938
18.05	2.18333	27.539	-3.22717	0.0630238	0.127064
19.05	1.899	27.714	-3.05742	0.0819309	0.0902626
20.1	1.95033	27.692	-3.07876	0.155473	0.0611746
21	2.13367	27.649	-3.12047	0.114293	0.180713
22	2.158	27.7413	-3.03091	0.136434	0.0616523
22.95	1.84667	27.4397	-3.32352	0.148005	0.137238
23.95	1.872	27.7212	-3.05039	0.153337	0.148712
24.75	1.7412	27.593	-3.17479	0.0945974	0.0958003
25.75	2.06233	27.27	-3.4881	0.10714	0.0466083
26.7	2.028	27.2635	-3.49441	0.00494975	0.077593
27.75	1.746	27.3857	-3.3759	0.0868178	0.123467
29.25	1.72675	27.7303	-3.04158	0.0928565	0.10974
30.25	1.90125	27.0883	-3.66432	0.129516	0.109165
31.3	1.993	27.0293	-3.72163	0.146373	0.109395
32.25	1.91775	27.4793	-3.28505	0.162746	0.0878308
33.25	1.97375	27.7543	-3.0183	0.164931	0.0904079
34.1	1.8036	27.6506	-3.11892	0.0870908	0.0758703
35.25	2.042	27.8177	-2.95686	0.108187	0.125583
36.15	2.2595	27.4453	-3.57	0.15	0.13
38.05	2.20525	27.3333	-3.31811	0.157726	0.10563
39.1	1.72	27.36	-3.4	0.19	0.13
40.25	2.20275	27.7538	-3.42667	0.163464	0.121434
41.25	2.13025	27.6457	-3.01886	0.144244	0.0984018
42.25	2.3205	27.0537	-3.1237	0.148436	0.139136
43	2.13225	27.0472	-3.69794	0.194896	0.152284
44	2.362	27.109	-3.70417	0.104694	0.0828548
44.5	2.46375	27.0148	-3.64427	0.219203	0.13435
45.9	2.07	27.1033	-3.73569	0.104052	0.109576
47.05	2.17175	27.089	-3.64977	0.0671218	0.0547449
48.05	2.0804	27.1882	-3.66367	0.141407	0.124245
49.05	2.3705	27.2435	-3.56745	0.0845056	0.0874031
50.05	2.15133	26.726	-3.51381	0.0883883	0.177484
50.8	2.2605	27.3615	-4.01578	0.124808	0.0770216
51.85	2.20767	26.499	-3.39935	0.00777817	0.0991716
52.85	2.118	26.573	-4.23597	0.0867929	0.138074
54	2.47	26.54	-4.2	0.13	0.13
55.05	2.30467	27.155	-4.16419	0.0749533	0.0254558
56.05	2.35767	26.7383	-3.59965	0.0851058	0.0943681
56.8	2.40367	26.3237	-4.00382	0.16919	0.101894
58.05	2.581	26.631	-4.40604	0.188768	0.102812
59.05	2.757	26.7065	-4.10793	0.12937	0.12833
59.85	2.7545	26.7715	-4.0347	0.10253	0.00565685
61	2.541	26.7043	-3.97164	0.0883883	0.0445477
62	2.7655	26.3135	-4.0368	0.161017	0.10748
63.05	2.753	26.9913	-4.41591	0.00777817	0.0982878
64.1	2.76033	26.407	-3.75841	0.0853366	0.106353
65.1	2.66967	26.5197	-4.32521	0.114564	0.0499633
65.85	2.6925	26.668	-4.21592	0.133268	0.030271
66.85	2.531	26.536	-4.07204	0.174502	0.0459619
67.85	2.3766	26.8338	-4.20008	0.0992321	0.0141421
69.1	2.214	26.035	-3.91126	0.109152	0.151047
