# Supplementary material for: Albian to Turonian agglutinated foraminiferal assemblages of the Lower Saxony Cretaceous sub-basins – implications for sequence stratigraphy and paleoenvironmental interpretation
Source: Copernicus journal article supplement (doi:10.5194/fr-24-395-2021), 2021-12-17
Supplement: Supplementary file 2 [file table s2.xlsx]

## Sheet: Wunstorf cores
Wunstorf cores	Wunstorf Wu 2010/4															Wunstorf Wu 2010/3													Wunstorf Wu 2010/1
Depth	38.2	43.3	48.2	48.7	48.95	53.15	58.6	63.15	68.1	73.55	75.75	78.5	80	83		25.25	30.15	35.2	40.15	45	49.65	55.25	60	65.3	65.8	66.05	70.5		15.2	19.05	24.75	29.25	34.1	39.1	44	49.05	54	54.65	54.8	59.05	64.1	69.1
Agathamminoides serpens	1	0	0	0	1	0	0	0	0	0	0	0	0	0		0	3	0	0	2	0	1	0	8	0	0	2		0	2	0	0	0	2	1	0	0	0	0	1	0	0
Ammobaculites agglutinans	0	0	0	6	0	0	0	0	0	0	0	0	0	0		0	0	0	0	0	1	0	0	0	0	0	2		0	0	2	2	0	1	1	3	0	0	1	0	2	0
Ammobaculites sp.	0	0	0	0	0	0	0	0	0	0	0	0	0	3		0	0	1	0	0	0	2	2	0	0	0	1		1	0	0	0	0	0	3	0	0	0	0	0	0	0
Ammobaculites wenonahae	0	0	2	0	0	1	0	0	0	0	0	0	0	0		11	5	13	12	8	7	2	5	7	13	2	3		3	1	5	0	10	5	8	3	6	7	4	0	0	0
Ammodiscus cretaceus	17	14	20	19	17	11	1	3	4	20	5	6	4	18		4	5	13	8	8	7	2	2	3	14	5	0		6	1	3	3	7	2	1	7	5	4	3	0	0	0
Ammodiscus glabratus	16	13	19	24	26	15	0	11	0	14	4	11	5	8		2	0	0	11	1	3	4	1	5	10	3	2		3	0	2	3	0	6	6	3	2	12	4	1	0	4
Ammodiscus peruvianus	8	8	4	8	26	3	0	5	3	14	3	7	0	5		3	6	6	4	1	3	1	5	3	4	0	0		2	1	1	1	0	0	2	5	2	1	0	0	0	0
Ammodiscus spp.	7	5	10	2	0	7	0	3	1	0	0	0	2	6		4	10	7	6	4	5	3	5	6	4	4	3		6	4	2	6	6	5	7	7	7	8	4	5	1	3
Ammodiscus tenuissimus	6	10	5	6	5	11	0	11	11	12	15	19	1	12		6	10	17	19	28	6	6	12	16	10	14	10		3	3	4	5	6	11	10	14	1	28	12	1	2	0
Ammolagena clavata	5	3	0	0	0	1	0	3	0	0	0	0	1	2		0	8	10	1	2	0	0	9	13	3	10	8		6	4	1	1	2	9	7	9	0	3	2	0	0	0
Ammolagena contorta	41	11	14	10	11	9	0	28	0	0	0	0	0	1		3	0	0	0	5	8	15	13	11	6	8	6		5	13	3	5	5	3	6	8	7	14	14	16	12	10
Arenobulimina barnardi	0	0	0	0	0	1	0	0	0	0	0	0	0	8		1	2	1	0	3	2	4	4	6	0	0	2		2	3	0	0	3	1	0	0	0	4	2	0	1	0
Arenobulimina bochumensis	24	31	16	20	15	5	37	12	0	0	0	0	0	2		15	15	16	6	13	15	26	6	13	13	10	14		19	26	15	17	22	11	20	21	11	42	38	27	33	12
Arenobulimina improcera	0	0	0	0	0	0	0	0	0	0	0	0	0	0		0	0	0	0	0	4	2	0	0	3	9	0		0	0	0	0	0	0	0	0	0	0	0	0	0	0
Arenobulimina preslii	33	42	38	25	34	31	91	23	7	1	20	0	0	0		3	4	7	7	4	6	18	0	10	7	3	6		9	13	8	12	17	8	12	0	0	0	0	0	0	0
Arenobulimina spp.	8	26	23	10	10	9	28	13	2	0	0	0	1	1		28	22	33	29	31	29	27	28	27	13	10	29		23	29	22	38	34	34	22	20	35	21	10	26	15	3
Arenobulimina truncata	28	44	25	22	13	20	62	8	3	0	0	0	0	2		0	0	0	0	0	0	0	0	0	0	0	0		0	0	0	0	0	0	0	0	0	0	0	0	0	0
Ataxophragmium compactum	0	0	0	0	0	0	2	0	0	0	0	0	0	0		0	0	0	0	0	0	0	0	0	0	0	0		0	0	0	0	0	0	0	0	0	0	0	0	0	0
Ataxophragmium depressum	2	1	0	0	0	2	8	0	0	0	0	0	0	0		11	18	17	21	13	10	14	15	13	14	15	15		14	7	12	12	16	17	21	21	7	31	23	5	10	39
Bathysiphon sp.	4	7	9	11	9	8	1	6	4	2	3	8	8	32		0	0	0	0	1	1	0	0	0	0	0	0		0	0	0	0	0	0	0	0	0	0	0	0	0	0
Bicazammina lagenaria	3	12	7	6	10	2	0	0	0	0	0	0	0	0		1	2	0	0	5	1	1	7	0	2	2	1		53	6	32	31	7	7	19	15	30	19	12	15	18	6
Bulbobaculites problematicus	12	15	18	14	12	11	1	25	227	146	132	188	167	1		0	0	0	0	0	0	0	0	0	0	0	0		0	0	0	0	0	1	0	0	0	1	0	0	0	3
Caudammina excelsa	0	0	0	0	0	0	0	0	0	0	0	0	0	0		0	0	0	0	1	0	0	0	0	3	0	0		0	0	0	0	0	0	0	0	1	0	1	0	1	0
Caudammina ovula	3	3	1	0	1	0	0	0	0	0	0	0	0	7		0	0	2	1	0	0	0	1	0	0	0	0		0	0	1	1	2	0	2	2	1	0	0	0	0	0
Caudammina ovuloides	0	0	0	0	0	0	0	0	0	0	0	0	0	0		4	3	1	1	5	2	5	0	0	5	1	4		3	2	0	3	3	3	5	3	2	4	1	0	1	0
Dolgenia pennyi	13	4	0	2	3	0	0	0	0	0	0	0	0	5		0	0	0	0	0	1	0	0	2	2	2	0		1	1	0	0	2	6	2	2	1	1	2	2	3	2
Eggerellina brevis	2	1	1	0	1	8	6	1	1	0	0	0	22	3		5	8	8	5	21	9	7	12	13	13	21	27		23	23	23	13	16	28	8	16	0	0	13	0	2	3
Eggerellina mariae	0	1	1	2	4	0	0	0	0	0	0	0	0	6		5	10	4	0	4	6	3	4	5	1	13	7		5	3	2	3	2	1	0	0	8	23	9	0	3	0
Eobigenerina kuhnti	1	0	2	1	0	0	0	0	0	0	0	0	1	0		6	12	7	6	10	4	6	2	5	0	8	9		5	5	5	7	10	10	6	0	5	22	18	8	14	6
Eobigenerina variabilis	6	3	12	19	20	1	2	34	14	37	104	16	5	5		0	0	0	0	0	0	0	0	0	2	0	0		0	0	0	0	0	0	0	0	0	0	0	0	0	0
Flourensina intermedia	0	0	0	0	0	0	0	0	0	0	0	0	0	1		2	1	0	0	0	1	0	0	0	0	2	0		0	0	0	0	0	0	0	0	0	3	2	0	0	0
Gaudryina sp. 1	0	0	0	0	0	0	0	0	0	0	0	0	1	4		21	18	4	18	16	23	29	15	18	16	19	16		19	18	4	18	20	17	25	12	31	17	27	31	14	0
Gaudryinopsis filiformis	0	0	0	0	0	0	0	0	0	0	0	0	0	0		0	1	0	0	3	0	0	0	1	2	3	0		0	0	0	0	2	0	1	2	0	2	1	0	0	0
Gerochammina stanislawi	9	15	27	27	43	44	0	9	0	5	4	3	1	7		6	5	6	6	5	6	7	4	9	7	3	2		8	4	7	1	5	4	8	5	1	3	2	0	0	0
Glomospira diffundens	5	8	10	9	5	8	0	9	1	0	0	0	0	0		1	6	9	7	1	10	7	3	8	8	6	1		9	2	2	1	4	2	10	3	2	2	2	1	0	0
Glomospira gordialis	20	13	16	15	4	11	2	7	0	2	0	0	0	7		7	9	16	9	7	3	3	3	6	8	0	5		16	5	3	3	3	4	4	5	2	0	2	0	0	0
Glomospira irregularis	3	4	4	7	3	5	0	0	0	0	0	1	0	7		1	2	0	1	1	2	1	1	2	1	0	0		3	0	0	1	3	1	4	1	0	1	0	0	0	0
Glomospira spp.	8	8	12	0	0	11	0	5	0	0	0	0	0	4		4	4	8	5	6	7	0	3	3	0	0	0		1	0	0	0	1	1	2	1	0	0	0	0	0	0
Hagenowella elevata	23	27	17	12	5	19	55	10	0	0	0	0	1	0		8	4	4	4	12	5	8	1	0	7	5	3		3	5	2	1	2	0	2	0	3	15	0	0	0	0
Hagenowella obesa	2	8	2	0	0	1	15	3	0	0	0	0	0	0		5	0	9	5	4	6	9	4	1	3	5	1		3	4	3	1	0	1	1	0	0	5	0	0	0	0
Haplophragmoides aff. bubiki	3	4	2	2	13	6	0	1	0	0	0	0	0	0		0	1	0	0	1	1	0	1	0	0	0	1		1	1	1	0	3	2	9	0	0	0	0	0	0	0
Haplophragmoides eggeri	0	0	0	1	3	2	1	1	0	0	4	0	3	4		0	2	2	1	0	1	3	0	7	8	4	2		0	1	2	2	4	0	3	7	0	0	1	0	0	0
Haplophragmoides pervagatus	0	0	0	0	0	0	0	0	0	0	0	0	0	0		0	0	2	0	1	0	0	1	0	0	0	0		0	0	0	0	1	0	1	0	0	0	0	0	0	0
Haplophragmoides porrectus	2	0	0	0	0	0	0	0	0	0	0	0	0	0		0	0	0	0	0	0	0	0	0	0	0	0		0	0	0	0	0	0	0	0	0	0	0	0	0	0
Haplophragmoides spp.	2	1	1	1	2	4	1	0	0	1	1	0	0	1		2	0	4	3	1	2	2	0	2	2	0	3		2	1	1	0	1	2	5	3	1	0	0	1	0	0
Haplophragmoides stomatus	2	0	0	1	4	0	0	0	0	0	0	0	0	0		0	0	0	0	0	0	0	0	0	5	0	0		0	0	0	0	0	2	0	0	0	0	0	0	0	0
Haplophragmoides suborbicularis	4	8	7	4	0	5	0	1	0	0	1	0	2	0		0	5	7	10	4	7	4	7	6	3	0	7		0	1	3	0	5	0	4	0	0	0	0	0	0	0
Haplophragmoides walteri	0	1	0	1	21	0	2	1	0	0	0	0	0	1		1	3	11	7	6	7	1	1	2	8	0	6		12	4	1	2	6	2	5	6	0	7	1	0	0	0
Hormosinelloides guttifer	0	0	0	0	0	0	0	0	0	0	1	0	0	0		0	0	0	0	0	0	0	0	0	0	0	0		0	0	0	0	1	0	0	0	0	0	0	0	0	0
Hyperammina gaultina	0	0	0	1	0	0	0	0	0	0	0	0	0	0		0	0	0	0	0	0	0	0	0	0	0	0		0	0	0	0	0	0	0	0	0	0	0	0	11	8
Kadriayina gradata	0	0	0	0	0	0	0	0	0	0	0	0	0	12		0	1	0	1	0	0	0	1	0	0	0	0		0	0	0	0	0	0	0	1	1	0	0	0	0	0
Lituotuba lituiformis	0	7	4	12	10	4	0	0	0	0	0	0	6	5		2	4	1	0	0	0	0	1	1	2	0	0		0	1	0	1	0	2	0	2	0	1	1	0	1	0
Marssonella ozawai	0	0	0	0	0	0	0	0	0	0	0	0	0	0		0	0	0	0	0	0	0	0	0	10	1	0		29	2	0	0	0	1	0	0	0	0	0	0	0	0
Nothia spp.	3	3	4	3	3	4	0	2	0	1	0	1	0	7		4	9	4	8	7	6	9	4	6	4	4	5		19	8	7	25	13	13	18	21	8	16	5	3	21	58
Parvigenerina sp. 3	7	12	9	18	17	4	0	0	6	5	0	17	0	0		1	2	1	0	1	0	0	0	0	0	2	0		0	0	0	0	0	0	0	0	0	0	0	0	0	0
Placentammina cf. placenta	0	0	0	0	0	0	0	0	0	0	0	0	0	0		0	0	0	0	0	0	0	0	0	0	1	0		0	0	2	0	0	0	4	0	2	0	0	5	2	11
Plectina cenomana	0	0	0	0	0	0	0	0	0	0	0	0	0	17		7	16	8	13	22	9	3	5	8	21	9	6		7	3	2	1	0	2	0	0	0	0	0	0	0	0
Plectina mariae	0	0	0	0	0	0	0	0	0	0	0	0	0	8		5	3	2	0	3	0	0	0	1	1	0	0		0	0	0	0	0	1	0	0	0	0	0	0	0	0
Psammosiphonella spp.	2	3	4	3	4	3	0	7	5	6	6	10	2	13		6	6	5	5	4	3	6	7	5	4	9	5		6	5	5	9	7	6	8	6	3	13	13	2	4	13
Psammosphaera fusca	0	0	0	0	0	0	0	0	0	0	0	0	0	0		0	0	0	4	2	0	1	0	0	0	0	0		0	1	0	4	1	0	0	2	41	2	0	38	21	19
Psammosphaera irregularis	0	0	0	0	0	0	0	0	0	0	0	0	0	2		0	0	0	0	0	0	0	0	0	2	0	1		0	0	0	0	0	0	4	1	7	2	1	1	5	9
Pseudonodosinella nodulosa	5	8	7	29	13	0	0	0	3	3	0	2	0	14		0	1	3	1	1	0	0	4	0	13	4	0		0	0	0	0	0	0	0	0	0	0	0	0	0	0
Pseudonodosinella parvula	4	3	2	24	21	3	0	5	5	3	0	1	0	8		0	1	3	0	0	0	0	1	5	1	8	0		3	1	0	0	0	0	7	3	0	0	1	0	0	0
Pseudonodosinella troyeri	0	0	0	0	0	0	0	0	2	2	0	2	0	4		0	1	1	2	2	0	1	4	4	6	3	0		3	0	4	3	0	3	4	2	0	0	1	0	0	0
Pseudotextulariella cretosa	0	0	1	0	0	1	2	0	0	0	0	0	0	0		1	0	0	1	11	4	7	0	1	0	2	8		3	1	0	1	0	0	0	0	0	0	0	0	0	0
Rashnovammina munda	0	0	1	0	0	0	0	0	0	0	0	0	0	0		0	0	0	0	0	0	0	0	0	1	0	0		0	0	0	0	0	0	0	0	0	0	0	0	0	0
Rectogerochammina eugubina	11	11	14	13	19	6	0	0	0	3	3	0	0	0		0	0	0	0	0	0	0	0	0	0	1	0		0	0	0	0	0	0	1	0	0	0	0	0	0	0
Reophax subfusiformis	0	0	0	0	0	0	0	0	0	0	0	0	0	0		0	0	0	0	0	0	0	0	0	0	0	0		0	0	0	0	0	0	0	0	25	0	1	10	18	42
Repmanina charoides	51	29	54	26	16	42	1	23	2	3	0	3	1	11		3	4	3	7	2	15	9	2	0	6	6	4		8	0	3	0	0	2	3	5	0	3	1	4	0	0
Rzehakina minima	0	0	0	0	0	0	0	0	0	0	0	0	0	0		0	0	0	0	0	0	0	0	0	0	0	0		4	0	1	2	0	2	0	1	0	2	2	0	1	0
Saccammina grzybowskii	9	2	5	1	5	7	1	9	2	5	4	1	0	4		0	2	1	1	6	4	7	1	3	0	2	5		8	1	3	4	2	4	5	6	3	8	2	4	14	18
Spiroplectammina navarroana	28	33	48	28	6	10	0	0	0	14	0	8	107	3		0	0	0	0	0	0	0	1	1	6	0	0		0	0	0	0	0	0	0	0	0	0	0	0	0	0
Spiroplectinata bettenstaedti	0	0	0	0	0	0	0	0	0	0	0	0	0	0		0	0	0	0	0	0	1	0	0	0	0	0		0	0	0	0	0	0	0	0	0	0	0	0	0	0
Spiroplectinella cretosa	0	0	0	0	0	0	0	0	0	0	0	0	0	0		0	0	0	0	0	0	0	0	0	0	2	0		2	2	0	0	0	0	0	0	0	0	0	0	0	0
Subreophax scalaris	0	0	0	0	0	0	0	0	0	0	0	0	0	0		0	0	0	0	0	0	0	0	0	6	0	0		1	0	4	4	1	0	10	1	0	1	0	0	1	18
Textulariopsis rioensis	0	0	0	0	0	0	0	0	0	0	0	0	0	0		0	0	0	0	0	0	0	0	0	0	0	0		1	0	0	0	0	0	0	0	0	0	0	0	2	0
Tipeammina sp. 1	6	8	1	1	4	3	0	5	0	0	0	0	0	1		5	4	5	4	3	3	3	4	4	1	2	4		1	2	2	1	5	4	4	4	2	6	6	1	1	1
Tolypammina sp.	5	6	5	1	1	4	1	14	1	2	0	1	1	11		0	0	0	0	0	0	0	0	0	0	0	0		0	23	51	0	2	27	15	0	2	2	0	1	0	0
Tritaxia gaultina	0	0	0	0	0	0	1	0	0	0	0	0	0	0		0	0	0	0	0	0	0	0	0	0	0	0		0	1	1	1	2	34	0	0	0	0	0	0	0	0
Tritaxia macfadyeni	0	1	0	0	1	0	0	1	0	0	0	0	0	0		147	7	7	52	33	4	12	39	1	4	42	23		0	16	50	7	0	1	9	19	91	47	32	47	39	29
Tritaxia tricarinata	8	13	8	12	7	0	31	6	0	0	0	0	0	1		0	1	1	4	0	0	2	3	6	16	3	6		0	1	3	1	4	1	1	5	2	2	0	0	0	0
Trochammina sp.	1	2	4	4	10	2	0	1	0	0	3	0	2	6		0	2	3	4	3	1	3	1	5	8	2	4		5	2	5	1	2	1	1	1	0	2	3	0	0	0
Trochamminoides sp.	5	8	10	5	8	9	0	4	0	0	10	0	2	8		3	5	3	3	6	4	2	11	0	5	14	10		8	7	3	0	1	2	1	0	0	2	0	0	0	0
Verneuilinoides sp.	4	2	7	14	11	1	0	6	0	0	0	0	1	2		1	0	1	0	0	0	0	0	0	0	0	1		0	0	0	0	0	0	0	0	0	0	0	0	0	0
Vialovella frankei	0	0	0	0	0	0	0	0	0	0	0	0	2	17		32	18	7	18	8	28	30	17	20	43	27	21		21	18	8	23	17	17	28	18	38	21	24	37	22	5
Voloshinoides advenus	0	0	0	0	0	0	0	0	0	0	0	0	0	0		8	19	10	3	10	25	30	24	21	8	14	12		12	14	3	15	10	12	18	10	24	14	16	30	13	8
Voloshinoides anglicus	0	0	0	0	0	0	0	0	0	0	0	0	0	0		3	6	3	6	7	8	15	9	6	11	4	4		10	16	2	17	13	7	19	5	14	13	30	0	0	0
Voloshinoides d`orbignyi	0	0	0	0	0	0	0	0	0	0	0	0	0	0		0	0	0	0	1	0	0	0	2	0	2	2		1	0	0	0	0	0	0	1	0	0	0	0	0	0
Fisher-Alpha Index	13.74	13.44	13.33	12.88	12.19	13.35	5.829	11.28	4.804	5.463	4.113	4.488	6.168	16.21		12.24	17.21	16.21	14.17	17.87	16.02	14.81	16.23	15.89	17.29	15.49	15.68		15.61	17.16	15.89	14.87	15.87	17.34	17.48	15.71	10.38	12.38	13.3	7.361	9.368	6.281
Species richness	52	51	49	46	48	53	56	48	39	45	44	28	33	25		43	51	49	46	55	49	48	49	49	55	49	48		49	49	48	46	45	45	23	37	20	22	18	19	25	49
Morpogroups in %
M1	3	3.8	4.3	3.7	3.6	5.1	0.6	9.2	3.3	3.7	2.8	6.6	3.2	19.9		6.5	11.7	9.8	10.9	7.3	6.8	8.8	9.5	8.5	5.8	8.5	9.1		9.5	6.9	7.9	15	13.2	11.4	12.3	16.4	4.6	14.4	13.4	3.4	11.7	33.6
M2a	3.8	2.6	1.4	0.6	2.1	2.7	0.3	4.4	0.7	1.7	1.5	0.3	0	4.4		0	0.9	0.9	2	2.4	1.2	2.2	0.9	0.9	1.3	0.9	1.9		1.9	0.6	1.8	2.9	1.9	1.4	3.6	3.8	12.9	2.8	1.1	14.9	17.5	20.6
M2b	1.3	2	2.7	1.9	3.8	2.9	0	1.6	0	0	4	0	1.1	4.4		0	0.9	1.3	2.3	0.8	0.3	1.4	1.3	3.3	6	1.4	3.1		1.2	0.9	2.4	0.6	1.9	0.6	0.5	1.9	0.5	0.9	0.9	0	0	0
M2c	5.9	6.6	9.4	5.8	1.3	2.7	0	0	0	4.7	0	2.6	30.7	0.9		0	0	0	0	0	0	0.3	0.3	0.3	1.5	0.6	0		0.5	0.6	0	0	0	0	0	0	0	0	0	0	0	0
M3a	32.8	24.5	30.8	27	24.3	34.1	1.1	24.4	7.2	21.6	8.4	15.4	5.4	27.8		13.1	19.9	26.2	22	13.2	21.5	12.1	11.1	16	20.6	8.5	7.5		17.1	6.6	8.8	8	13.5	11.1	14.5	16	6.7	10.5	7.4	3.4	1.3	2.1
M3b	9.7	2.8	2.7	2.1	2.3	2.7	0	9.8	0	0	0	0	0.3	0.9		1.5	5.7	8.5	5.7	8.1	1.8	1.6	6.6	8.8	3.3	6.8	5.6		2.1	2.2	1.5	1.9	2.6	5.7	4.1	7.2	0.2	6.8	4	0.3	0.6	0
M4a	2.8	2.8	1.9	2.1	9	4.5	1.1	1.3	0	0.3	1.9	0	1.4	1.9		0.8	3.5	8.2	6	3.5	5.5	2.7	3.2	5.1	6.5	1.1	6		3.6	2.5	2.4	1.3	6.4	2.3	6.5	5	0.2	1.5	0.6	0.3	0	0
M4b	40.7	55	46.8	56.8	53.7	45.3	96.9	49.4	88.8	68.1	81.4	75.1	57.9	39.7		78.1	57.3	45.1	51.1	64.6	62.8	70.9	67.1	57.1	55.1	72.1	66.8		64.1	79.6	75.2	70.3	60.5	67.5	58.4	49.7	74.9	63	72.6	77.7	68.8	43.6
Counted specimens	472	502	513	482	477	375	352	316	304	301	323	305	349	317		398	316	317	350	370	325	364	316	331	399	351	319		421	318	331	313	311	351	413	318	434	457	350	323	308	330
Relative abundances in %
Agathamminoides serpens	0.211864	0	0	0	0.209644	0	0	0	0	0	0	0	0	0		0	0.949367	0	0	0.540541	0	0.274725	0	2.41692	0	0	0.626959		0	0.628931	0	0	0	0.569801	0.242131	0	0	0	0	0.309598	0	0
Ammobaculites agglutinans	0	0	0	1.24481	0	0	0	0	0	0	0	0	0	0		0	0	0	0	0	0.307692	0	0	0	0	0	0.626959		0	0	0.60423	0.638978	0	0.2849	0.242131	0.943396	0	0	0.285714	0	0.649351	0
Ammobaculites sp.	0	0	0	0	0	0	0	0	0	0	0	0	0	0.946372		0	0	0.315457	0	0	0	0.549451	0.632911	0	0	0	0.31348		0.23753	0	0	0	0	0	0.726392	0	0	0	0	0	0	0
Ammobaculites wenonahae	0	0	0.389864	0	0	0.266667	0	0	0	0	0	0	0	0		2.76382	1.58228	4.10095	3.42857	2.16216	2.15385	0.549451	1.58228	2.1148	3.25815	0.569801	0.940439		0.712589	0.314465	1.51057	0	3.21543	1.4245	1.93705	0.943396	1.38249	1.53173	1.14286	0	0	0
Ammodiscus cretaceus	3.60169	2.78884	3.89864	3.94191	3.56394	2.93333	0.284091	0.949367	1.31579	6.64452	1.54799	1.96721	1.14613	5.67823		1.00503	1.58228	4.10095	2.28571	2.16216	2.15385	0.549451	0.632911	0.906344	3.50877	1.4245	0		1.42518	0.314465	0.906344	0.958466	2.2508	0.569801	0.242131	2.20126	1.15207	0.875274	0.857143	0	0	0
Ammodiscus glabratus	3.38983	2.58964	3.7037	4.97925	5.45073	4	0	3.48101	0	4.65116	1.23839	3.60656	1.43266	2.52366		0.502513	0	0	3.14286	0.27027	0.923077	1.0989	0.316456	1.51057	2.50627	0.854701	0.626959		0.712589	0	0.60423	0.958466	0	1.7094	1.45278	0.943396	0.460829	2.62582	1.14286	0.309598	0	1.21212
Ammodiscus peruvianus	1.69492	1.59363	0.779727	1.65975	5.45073	0.8	0	1.58228	0.986842	4.65116	0.928793	2.29508	0	1.57729		0.753769	1.89873	1.89274	1.14286	0.27027	0.923077	0.274725	1.58228	0.906344	1.00251	0	0		0.475059	0.314465	0.302115	0.319489	0	0	0.484262	1.57233	0.460829	0.218818	0	0	0	0
Ammodiscus spp.	1.48305	0.996016	1.94932	0.414938	0	1.86667	0	0.949367	0.328947	0	0	0	0.573066	1.89274		1.00503	3.16456	2.2082	1.71429	1.08108	1.53846	0.824176	1.58228	1.81269	1.00251	1.1396	0.940439		1.42518	1.25786	0.60423	1.91693	1.92926	1.4245	1.69492	2.20126	1.6129	1.75055	1.14286	1.54799	0.324675	0.909091
Ammodiscus tenuissimus	1.27119	1.99203	0.974659	1.24481	1.04822	2.93333	0	3.48101	3.61842	3.98671	4.64396	6.22951	0.286533	3.78549		1.50754	3.16456	5.36278	5.42857	7.56757	1.84615	1.64835	3.79747	4.83384	2.50627	3.9886	3.1348		0.712589	0.943396	1.20846	1.59744	1.92926	3.1339	2.42131	4.40252	0.230415	6.12691	3.42857	0.309598	0.649351	0
Ammolagena clavata	1.05932	0.59761	0	0	0	0.266667	0	0.949367	0	0	0	0	0.286533	0.630915		0	2.53165	3.15457	0.285714	0.540541	0	0	2.8481	3.92749	0.75188	2.849	2.50784		1.42518	1.25786	0.302115	0.319489	0.643087	2.5641	1.69492	2.83019	0	0.656455	0.571429	0	0	0
Ammolagena contorta	8.68644	2.19124	2.72904	2.07469	2.30608	2.4	0	8.86076	0	0	0	0	0	0.315457		0.753769	0	0	0	1.35135	2.46154	4.12088	4.11392	3.32326	1.50376	2.2792	1.88088		1.18765	4.08805	0.906344	1.59744	1.60772	0.854701	1.45278	2.51572	1.6129	3.06346	4	4.95356	3.8961	3.0303
Arenobulimina barnardi	0	0	0	0	0	0.266667	0	0	0	0	0	0	0	2.52366		0.251256	0.632911	0.315457	0	0.810811	0.615385	1.0989	1.26582	1.81269	0	0	0.626959		0.475059	0.943396	0	0	0.96463	0.2849	0	0	0	0.875274	0.571429	0	0.324675	0
Arenobulimina bochumensis	5.08475	6.1753	3.11891	4.14938	3.14465	1.33333	10.5114	3.79747	0	0	0	0	0	0.630915		3.76884	4.74684	5.04732	1.71429	3.51351	4.61538	7.14286	1.89873	3.92749	3.25815	2.849	4.38871		4.51306	8.1761	4.53172	5.43131	7.07395	3.1339	4.84262	6.60377	2.53456	9.19037	10.8571	8.35913	10.7143	3.63636
Arenobulimina improcera	0	0	0	0	0	0	0	0	0	0	0	0	0	0		0	0	0	0	0	1.23077	0.549451	0	0	0.75188	2.5641	0		0	0	0	0	0	0	0	0	0	0	0	0	0	0
Arenobulimina preslii	6.99153	8.36653	7.40741	5.18672	7.12788	8.26667	25.8523	7.27848	2.30263	0.332226	6.19195	0	0	0		0.753769	1.26582	2.2082	2	1.08108	1.84615	4.94505	0	3.02115	1.75439	0.854701	1.88088		2.13777	4.08805	2.41692	3.83387	5.46624	2.2792	2.90557	0	0	0	0	0	0	0
Arenobulimina spp.	1.69492	5.17928	4.48343	2.07469	2.09644	2.4	7.95455	4.11392	0.657895	0	0	0	0.286533	0.315457		7.03518	6.96203	10.4101	8.28571	8.37838	8.92308	7.41758	8.86076	8.1571	3.25815	2.849	9.09091		5.46318	9.1195	6.64653	12.1406	10.9325	9.68661	5.32688	6.28931	8.06452	4.59519	2.85714	8.04954	4.87013	0.909091
Arenobulimina truncata	5.9322	8.76494	4.87329	4.56432	2.72537	5.33333	17.6136	2.53165	0.986842	0	0	0	0	0.630915		0	0	0	0	0	0	0	0	0	0	0	0		0	0	0	0	0	0	0	0	0	0	0	0	0	0
Ataxophragmium compactum	0	0	0	0	0	0	0.568182	0	0	0	0	0	0	0		0	0	0	0	0	0	0	0	0	0	0	0		0	0	0	0	0	0	0	0	0	0	0	0	0	0
Ataxophragmium depressum	0.423729	0.199203	0	0	0	0.533333	2.27273	0	0	0	0	0	0	0		2.76382	5.6962	5.36278	6	3.51351	3.07692	3.84615	4.74684	3.92749	3.50877	4.2735	4.70219		3.32542	2.20126	3.62538	3.83387	5.14469	4.8433	5.08475	6.60377	1.6129	6.78337	6.57143	1.54799	3.24675	11.8182
Bathysiphon sp.	0.847458	1.39442	1.75439	2.28216	1.88679	2.13333	0.284091	1.89873	1.31579	0.664452	0.928793	2.62295	2.29226	10.0946		0	0	0	0	0.27027	0.307692	0	0	0	0	0	0		0	0	0	0	0	0	0	0	0	0	0	0	0	0
Bicazammina lagenaria	0.635593	2.39044	1.36452	1.24481	2.09644	0.533333	0	0	0	0	0	0	0	0		0.251256	0.632911	0	0	1.35135	0.307692	0.274725	2.21519	0	0.501253	0.569801	0.31348		12.5891	1.88679	9.66767	9.90415	2.2508	1.9943	4.60048	4.71698	6.91244	4.15755	3.42857	4.64396	5.84416	1.81818
Bulbobaculites problematicus	2.54237	2.98805	3.50877	2.90456	2.51572	2.93333	0.284091	7.91139	74.6711	48.505	40.8669	61.6393	47.851	0.315457		0	0	0	0	0	0	0	0	0	0	0	0		0	0	0	0	0	0.2849	0	0	0	0.218818	0	0	0	0.909091
Caudammina excelsa	0	0	0	0	0	0	0	0	0	0	0	0	0	0		0	0	0	0	0.27027	0	0	0	0	0.75188	0	0		0	0	0	0	0	0	0	0	0.230415	0	0.285714	0	0.324675	0
Caudammina ovula	0.635593	0.59761	0.194932	0	0.209644	0	0	0	0	0	0	0	0	2.2082		0	0	0.630915	0.285714	0	0	0	0.316456	0	0	0	0		0	0	0.302115	0.319489	0.643087	0	0.484262	0.628931	0.230415	0	0	0	0	0
Caudammina ovuloides	0	0	0	0	0	0	0	0	0	0	0	0	0	0		1.00503	0.949367	0.315457	0.285714	1.35135	0.615385	1.37363	0	0	1.25313	0.2849	1.25392		0.712589	0.628931	0	0.958466	0.96463	0.854701	1.21065	0.943396	0.460829	0.875274	0.285714	0	0.324675	0
Dolgenia pennyi	2.75424	0.796813	0	0.414938	0.628931	0	0	0	0	0	0	0	0	1.57729		0	0	0	0	0	0.307692	0	0	0.60423	0.501253	0.569801	0		0.23753	0.314465	0	0	0.643087	1.7094	0.484262	0.628931	0.230415	0.218818	0.571429	0.619195	0.974026	0.606061
Eggerellina brevis	0.423729	0.199203	0.194932	0	0.209644	2.13333	1.70455	0.316456	0.328947	0	0	0	6.30372	0.946372		1.25628	2.53165	2.52366	1.42857	5.67568	2.76923	1.92308	3.79747	3.92749	3.25815	5.98291	8.46395		5.46318	7.2327	6.94864	4.15335	5.14469	7.97721	1.93705	5.03145	0	0	3.71429	0	0.649351	0.909091
Eggerellina mariae	0	0.199203	0.194932	0.414938	0.838574	0	0	0	0	0	0	0	0	1.89274		1.25628	3.16456	1.26183	0	1.08108	1.84615	0.824176	1.26582	1.51057	0.250627	3.7037	2.19436		1.18765	0.943396	0.60423	0.958466	0.643087	0.2849	0	0	1.84332	5.03282	2.57143	0	0.974026	0
Eobigenerina kuhnti	0.211864	0	0.389864	0.207469	0	0	0	0	0	0	0	0	0.286533	0		1.50754	3.79747	2.2082	1.71429	2.7027	1.23077	1.64835	0.632911	1.51057	0	2.2792	2.82132		1.18765	1.57233	1.51057	2.23642	3.21543	2.849	1.45278	0	1.15207	4.814	5.14286	2.47678	4.54545	1.81818
Eobigenerina variabilis	1.27119	0.59761	2.33918	3.94191	4.19287	0.266667	0.568182	10.7595	4.60526	12.2924	32.1981	5.2459	1.43266	1.57729		0	0	0	0	0	0	0	0	0	0.501253	0	0		0	0	0	0	0	0	0	0	0	0	0	0	0	0
Flourensina intermedia	0	0	0	0	0	0	0	0	0	0	0	0	0	0.315457		0.502513	0.316456	0	0	0	0.307692	0	0	0	0	0.569801	0		0	0	0	0	0	0	0	0	0	0.656455	0.571429	0	0	0
Gaudryina sp. 1	0	0	0	0	0	0	0	0	0	0	0	0	0.286533	1.26183		5.27638	5.6962	1.26183	5.14286	4.32432	7.07692	7.96703	4.74684	5.43807	4.01003	5.41311	5.01567		4.51306	5.66038	1.20846	5.7508	6.43087	4.8433	6.05327	3.77358	7.14286	3.71991	7.71429	9.59752	4.54545	0
Gaudryinopsis filiformis	0	0	0	0	0	0	0	0	0	0	0	0	0	0		0	0.316456	0	0	0.810811	0	0	0	0.302115	0.501253	0.854701	0		0	0	0	0	0.643087	0	0.242131	0.628931	0	0.437637	0.285714	0	0	0
Gerochammina stanislawi	1.90678	2.98805	5.26316	5.60166	9.01468	11.7333	0	2.8481	0	1.66113	1.23839	0.983607	0.286533	2.2082		1.50754	1.58228	1.89274	1.71429	1.35135	1.84615	1.92308	1.26582	2.71903	1.75439	0.854701	0.626959		1.90024	1.25786	2.1148	0.319489	1.60772	1.1396	1.93705	1.57233	0.230415	0.656455	0.571429	0	0	0
Glomospira diffundens	1.05932	1.59363	1.94932	1.86722	1.04822	2.13333	0	2.8481	0.328947	0	0	0	0	0		0.251256	1.89873	2.83912	2	0.27027	3.07692	1.92308	0.949367	2.41692	2.00501	1.7094	0.31348		2.13777	0.628931	0.60423	0.319489	1.28617	0.569801	2.42131	0.943396	0.460829	0.437637	0.571429	0.309598	0	0
Glomospira gordialis	4.23729	2.58964	3.11891	3.11203	0.838574	2.93333	0.568182	2.21519	0	0.664452	0	0	0	2.2082		1.75879	2.8481	5.04732	2.57143	1.89189	0.923077	0.824176	0.949367	1.81269	2.00501	0	1.5674		3.80048	1.57233	0.906344	0.958466	0.96463	1.1396	0.968523	1.57233	0.460829	0	0.571429	0	0	0
Glomospira irregularis	0.635593	0.796813	0.779727	1.45228	0.628931	1.33333	0	0	0	0	0	0.327869	0	2.2082		0.251256	0.632911	0	0.285714	0.27027	0.615385	0.274725	0.316456	0.60423	0.250627	0	0		0.712589	0	0	0.319489	0.96463	0.2849	0.968523	0.314465	0	0.218818	0	0	0	0
Glomospira spp.	1.69492	1.59363	2.33918	0	0	2.93333	0	1.58228	0	0	0	0	0	1.26183		1.00503	1.26582	2.52366	1.42857	1.62162	2.15385	0	0.949367	0.906344	0	0	0		0.23753	0	0	0	0.321543	0.2849	0.484262	0.314465	0	0	0	0	0	0
Hagenowella elevata	4.87288	5.37849	3.31384	2.48963	1.04822	5.06667	15.625	3.16456	0	0	0	0	0.286533	0		2.01005	1.26582	1.26183	1.14286	3.24324	1.53846	2.1978	0.316456	0	1.75439	1.4245	0.940439		0.712589	1.57233	0.60423	0.319489	0.643087	0	0.484262	0	0.691244	3.28228	0	0	0	0
Hagenowella obesa	0.423729	1.59363	0.389864	0	0	0.266667	4.26136	0.949367	0	0	0	0	0	0		1.25628	0	2.83912	1.42857	1.08108	1.84615	2.47253	1.26582	0.302115	0.75188	1.4245	0.31348		0.712589	1.25786	0.906344	0.319489	0	0.2849	0.242131	0	0	1.09409	0	0	0	0
Haplophragmoides aff. bubiki	0.635593	0.796813	0.389864	0.414938	2.72537	1.6	0	0.316456	0	0	0	0	0	0		0	0.316456	0	0	0.27027	0.307692	0	0.316456	0	0	0	0.31348		0.23753	0.314465	0.302115	0	0.96463	0.569801	2.17918	0	0	0	0	0	0	0
Haplophragmoides eggeri	0	0	0	0.207469	0.628931	0.533333	0.284091	0.316456	0	0	1.23839	0	0.859599	1.26183		0	0.632911	0.630915	0.285714	0	0.307692	0.824176	0	2.1148	2.00501	1.1396	0.626959		0	0.314465	0.60423	0.638978	1.28617	0	0.726392	2.20126	0	0	0.285714	0	0	0
Haplophragmoides pervagatus	0	0	0	0	0	0	0	0	0	0	0	0	0	0		0	0	0.630915	0	0.27027	0	0	0.316456	0	0	0	0		0	0	0	0	0.321543	0	0.242131	0	0	0	0	0	0	0
Haplophragmoides porrectus	0.423729	0	0	0	0	0	0	0	0	0	0	0	0	0		0	0	0	0	0	0	0	0	0	0	0	0		0	0	0	0	0	0	0	0	0	0	0	0	0	0
Haplophragmoides spp.	0.423729	0.199203	0.194932	0.207469	0.419287	1.06667	0.284091	0	0	0.332226	0.309598	0	0	0.315457		0.502513	0	1.26183	0.857143	0.27027	0.615385	0.549451	0	0.60423	0.501253	0	0.940439		0.475059	0.314465	0.302115	0	0.321543	0.569801	1.21065	0.943396	0.230415	0	0	0.309598	0	0
Haplophragmoides stomatus	0.423729	0	0	0.207469	0.838574	0	0	0	0	0	0	0	0	0		0	0	0	0	0	0	0	0	0	1.25313	0	0		0	0	0	0	0	0.569801	0	0	0	0	0	0	0	0
Haplophragmoides suborbicularis	0.847458	1.59363	1.36452	0.829876	0	1.33333	0	0.316456	0	0	0.309598	0	0.573066	0		0	1.58228	2.2082	2.85714	1.08108	2.15385	1.0989	2.21519	1.81269	0.75188	0	2.19436		0	0.314465	0.906344	0	1.60772	0	0.968523	0	0	0	0	0	0	0
Haplophragmoides walteri	0	0.199203	0	0.207469	4.40252	0	0.568182	0.316456	0	0	0	0	0	0.315457		0.251256	0.949367	3.47003	2	1.62162	2.15385	0.274725	0.316456	0.60423	2.00501	0	1.88088		2.85036	1.25786	0.302115	0.638978	1.92926	0.569801	1.21065	1.88679	0	1.53173	0.285714	0	0	0
Hormosinelloides guttifer	0	0	0	0	0	0	0	0	0	0	0.309598	0	0	0		0	0	0	0	0	0	0	0	0	0	0	0		0	0	0	0	0.321543	0	0	0	0	0	0	0	0	0
Hyperammina gaultina	0	0	0	0.207469	0	0	0	0	0	0	0	0	0	0		0	0	0	0	0	0	0	0	0	0	0	0		0	0	0	0	0	0	0	0	0	0	0	0	3.57143	2.42424
Kadriayina gradata	0	0	0	0	0	0	0	0	0	0	0	0	0	3.78549		0	0.316456	0	0.285714	0	0	0	0.316456	0	0	0	0		0	0	0	0	0	0	0	0.314465	0.230415	0	0	0	0	0
Lituotuba lituiformis	0	1.39442	0.779727	2.48963	2.09644	1.06667	0	0	0	0	0	0	1.7192	1.57729		0.502513	1.26582	0.315457	0	0	0	0	0.316456	0.302115	0.501253	0	0		0	0.314465	0	0.319489	0	0.569801	0	0.628931	0	0.218818	0.285714	0	0.324675	0
Marssonella ozawai	0	0	0	0	0	0	0	0	0	0	0	0	0	0		0	0	0	0	0	0	0	0	0	2.50627	0.2849	0		6.88836	0.628931	0	0	0	0.2849	0	0	0	0	0	0	0	0
Nothia spp.	0.635593	0.59761	0.779727	0.622407	0.628931	1.06667	0	0.632911	0	0.332226	0	0.327869	0	2.2082		1.00503	2.8481	1.26183	2.28571	1.89189	1.84615	2.47253	1.26582	1.81269	1.00251	1.1396	1.5674		4.51306	2.51572	2.1148	7.98722	4.18006	3.7037	4.35835	6.60377	1.84332	3.50109	1.42857	0.928793	6.81818	17.5758
Parvigenerina sp. 3	1.48305	2.39044	1.75439	3.73444	3.56394	1.06667	0	0	1.97368	1.66113	0	5.57377	0	0		0.251256	0.632911	0.315457	0	0.27027	0	0	0	0	0	0.569801	0		0	0	0	0	0	0	0	0	0	0	0	0	0	0
Placentammina cf. placenta	0	0	0	0	0	0	0	0	0	0	0	0	0	0		0	0	0	0	0	0	0	0	0	0	0.2849	0		0	0	0.60423	0	0	0	0.968523	0	0.460829	0	0	1.54799	0.649351	3.33333
Plectina cenomana	0	0	0	0	0	0	0	0	0	0	0	0	0	5.36278		1.75879	5.06329	2.52366	3.71429	5.94595	2.76923	0.824176	1.58228	2.41692	5.26316	2.5641	1.88088		1.66271	0.943396	0.60423	0.319489	0	0.569801	0	0	0	0	0	0	0	0
Plectina mariae	0	0	0	0	0	0	0	0	0	0	0	0	0	2.52366		1.25628	0.949367	0.630915	0	0.810811	0	0	0	0.302115	0.250627	0	0		0	0	0	0	0	0.2849	0	0	0	0	0	0	0	0
Psammosiphonella spp.	0.423729	0.59761	0.779727	0.622407	0.838574	0.8	0	2.21519	1.64474	1.99336	1.85759	3.27869	0.573066	4.10095		1.50754	1.89873	1.57729	1.42857	1.08108	0.923077	1.64835	2.21519	1.51057	1.00251	2.5641	1.5674		1.42518	1.57233	1.51057	2.8754	2.2508	1.7094	1.93705	1.88679	0.691244	2.84464	3.71429	0.619195	1.2987	3.93939
Psammosphaera fusca	0	0	0	0	0	0	0	0	0	0	0	0	0	0		0	0	0	1.14286	0.540541	0	0.274725	0	0	0	0	0		0	0.314465	0	1.27796	0.321543	0	0	0.628931	9.447	0.437637	0	11.7647	6.81818	5.75758
Psammosphaera irregularis	0	0	0	0	0	0	0	0	0	0	0	0	0	0.630915		0	0	0	0	0	0	0	0	0	0.501253	0	0.31348		0	0	0	0	0	0	0.968523	0.314465	1.6129	0.437637	0.285714	0.309598	1.62338	2.72727
Pseudonodosinella nodulosa	1.05932	1.59363	1.36452	6.0166	2.72537	0	0	0	0.986842	0.996678	0	0.655738	0	4.4164		0	0.316456	0.946372	0.285714	0.27027	0	0	1.26582	0	3.25815	1.1396	0		0	0	0	0	0	0	0	0	0	0	0	0	0	0
Pseudonodosinella parvula	0.847458	0.59761	0.389864	4.97925	4.40252	0.8	0	1.58228	1.64474	0.996678	0	0.327869	0	2.52366		0	0.316456	0.946372	0	0	0	0	0.316456	1.51057	0.250627	2.2792	0		0.712589	0.314465	0	0	0	0	1.69492	0.943396	0	0	0.285714	0	0	0
Pseudonodosinella troyeri	0	0	0	0	0	0	0	0	0.657895	0.664452	0	0.655738	0	1.26183		0	0.316456	0.315457	0.571429	0.540541	0	0.274725	1.26582	1.20846	1.50376	0.854701	0		0.712589	0	1.20846	0.958466	0	0.854701	0.968523	0.628931	0	0	0.285714	0	0	0
Pseudotextulariella cretosa	0	0	0.194932	0	0	0.266667	0.568182	0	0	0	0	0	0	0		0.251256	0	0	0.285714	2.97297	1.23077	1.92308	0	0.302115	0	0.569801	2.50784		0.712589	0.314465	0	0.319489	0	0	0	0	0	0	0	0	0	0
Rashnovammina munda	0	0	0.194932	0	0	0	0	0	0	0	0	0	0	0		0	0	0	0	0	0	0	0	0	0.250627	0	0		0	0	0	0	0	0	0	0	0	0	0	0	0	0
Rectogerochammina eugubina	2.33051	2.19124	2.72904	2.6971	3.98323	1.6	0	0	0	0.996678	0.928793	0	0	0		0	0	0	0	0	0	0	0	0	0	0.2849	0		0	0	0	0	0	0	0.242131	0	0	0	0	0	0	0
Reophax subfusiformis	0	0	0	0	0	0	0	0	0	0	0	0	0	0		0	0	0	0	0	0	0	0	0	0	0	0		0	0	0	0	0	0	0	0	5.76037	0	0.285714	3.09598	5.84416	12.7273
Repmanina charoides	10.8051	5.77689	10.5263	5.39419	3.3543	11.2	0.284091	7.27848	0.657895	0.996678	0	0.983607	0.286533	3.47003		0.753769	1.26582	0.946372	2	0.540541	4.61538	2.47253	0.632911	0	1.50376	1.7094	1.25392		1.90024	0	0.906344	0	0	0.569801	0.726392	1.57233	0	0.656455	0.285714	1.23839	0	0
Rzehakina minima	0	0	0	0	0	0	0	0	0	0	0	0	0	0		0	0	0	0	0	0	0	0	0	0	0	0		0.950119	0	0.302115	0.638978	0	0.569801	0	0.314465	0	0.437637	0.571429	0	0.324675	0
Saccammina grzybowskii	1.90678	0.398406	0.974659	0.207469	1.04822	1.86667	0.284091	2.8481	0.657895	1.66113	1.23839	0.327869	0	1.26183		0	0.632911	0.315457	0.285714	1.62162	1.23077	1.92308	0.316456	0.906344	0	0.569801	1.5674		1.90024	0.314465	0.906344	1.27796	0.643087	1.1396	1.21065	1.88679	0.691244	1.75055	0.571429	1.23839	4.54545	5.45455
Spiroplectammina navarroana	5.9322	6.57371	9.35673	5.80913	1.25786	2.66667	0	0	0	4.65116	0	2.62295	30.659	0.946372		0	0	0	0	0	0	0	0.316456	0.302115	1.50376	0	0		0	0	0	0	0	0	0	0	0	0	0	0	0	0
Spiroplectinata bettenstaedti	0	0	0	0	0	0	0	0	0	0	0	0	0	0		0	0	0	0	0	0	0.274725	0	0	0	0	0		0	0	0	0	0	0	0	0	0	0	0	0	0	0
Spiroplectinella cretosa	0	0	0	0	0	0	0	0	0	0	0	0	0	0		0	0	0	0	0	0	0	0	0	0	0.569801	0		0.475059	0.628931	0	0	0	0	0	0	0	0	0	0	0	0
Subreophax scalaris	0	0	0	0	0	0	0	0	0	0	0	0	0	0		0	0	0	0	0	0	0	0	0	1.50376	0	0		0.23753	0	1.20846	1.27796	0.321543	0	2.42131	0.314465	0	0.218818	0	0	0.324675	5.45455
Textulariopsis rioensis	0	0	0	0	0	0	0	0	0	0	0	0	0	0		0	0	0	0	0	0	0	0	0	0	0	0		0.23753	0	0	0	0	0	0	0	0	0	0	0	0.649351	0
Tipeammina sp. 1	1.27119	1.59363	0.194932	0.207469	0.838574	0.8	0	1.58228	0	0	0	0	0	0.315457		1.25628	1.26582	1.57729	1.14286	0.810811	0.923077	0.824176	1.26582	1.20846	0.250627	0.569801	1.25392		0.23753	0.628931	0.60423	0.319489	1.60772	1.1396	0.968523	1.25786	0.460829	1.31291	1.71429	0.309598	0.324675	0.30303
Tolypammina sp.	1.05932	1.19522	0.974659	0.207469	0.209644	1.06667	0.284091	4.43038	0.328947	0.664452	0	0.327869	0.286533	3.47003		0	0	0	0	0	0	0	0	0	0	0	0		0	7.2327	15.4079	0	0.643087	7.69231	3.63196	0	0.460829	0.437637	0	0.309598	0	0
Tritaxia gaultina	0	0	0	0	0	0	0.284091	0	0	0	0	0	0	0		0	0	0	0	0	0	0	0	0	0	0	0		0	0.314465	0.302115	0.319489	0.643087	9.68661	0	0	0	0	0	0	0	0
Tritaxia macfadyeni	0	0.199203	0	0	0.209644	0	0	0.316456	0	0	0	0	0	0		36.9347	2.21519	2.2082	14.8571	8.91892	1.23077	3.2967	12.3418	0.302115	1.00251	11.9658	7.21003		0	5.03145	15.1057	2.23642	0	0.2849	2.17918	5.97484	20.9677	10.2845	9.14286	14.5511	12.6623	8.78788
Tritaxia tricarinata	1.69492	2.58964	1.55945	2.48963	1.46751	0	8.80682	1.89873	0	0	0	0	0	0.315457		0	0.316456	0.315457	1.14286	0	0	0.549451	0.949367	1.81269	4.01003	0.854701	1.88088		0	0.314465	0.906344	0.319489	1.28617	0.2849	0.242131	1.57233	0.460829	0.437637	0	0	0	0
Trochammina sp.	0.211864	0.398406	0.779727	0.829876	2.09644	0.533333	0	0.316456	0	0	0.928793	0	0.573066	1.89274		0	0.632911	0.946372	1.14286	0.810811	0.307692	0.824176	0.316456	1.51057	2.00501	0.569801	1.25392		1.18765	0.628931	1.51057	0.319489	0.643087	0.2849	0.242131	0.314465	0	0.437637	0.857143	0	0	0
Trochamminoides sp.	1.05932	1.59363	1.94932	1.03734	1.67715	2.4	0	1.26582	0	0	3.09598	0	0.573066	2.52366		0.753769	1.58228	0.946372	0.857143	1.62162	1.23077	0.549451	3.48101	0	1.25313	3.9886	3.1348		1.90024	2.20126	0.906344	0	0.321543	0.569801	0.242131	0	0	0.437637	0	0	0	0
Verneuilinoides sp.	0.847458	0.398406	1.36452	2.90456	2.30608	0.266667	0	1.89873	0	0	0	0	0.286533	0.630915		0.251256	0	0.315457	0	0	0	0	0	0	0	0	0.31348		0	0	0	0	0	0	0	0	0	0	0	0	0	0
Vialovella frankei	0	0	0	0	0	0	0	0	0	0	0	0	0.573066	5.36278		8.0402	5.6962	2.2082	5.14286	2.16216	8.61538	8.24176	5.37975	6.0423	10.7769	7.69231	6.58307		4.98812	5.66038	2.41692	7.34824	5.46624	4.8433	6.77966	5.66038	8.75576	4.59519	6.85714	11.4551	7.14286	1.51515
Voloshinoides advenus	0	0	0	0	0	0	0	0	0	0	0	0	0	0		2.01005	6.01266	3.15457	0.857143	2.7027	7.69231	8.24176	7.59494	6.34441	2.00501	3.9886	3.76176		2.85036	4.40252	0.906344	4.79233	3.21543	3.4188	4.35835	3.14465	5.52995	3.06346	4.57143	9.28793	4.22078	2.42424
Voloshinoides anglicus	0	0	0	0	0	0	0	0	0	0	0	0	0	0		0.753769	1.89873	0.946372	1.71429	1.89189	2.46154	4.12088	2.8481	1.81269	2.75689	1.1396	1.25392		2.3753	5.03145	0.60423	5.43131	4.18006	1.9943	4.60048	1.57233	3.22581	2.84464	8.57143	0	0	0
Voloshinoides d`orbignyi	0	0	0	0	0	0	0	0	0	0	0	0	0	0		0	0	0	0	0.27027	0	0	0	0.60423	0	0.569801	0.626959		0.23753	0	0	0	0	0	0	0.314465	0	0	0	0	0	0
							0	0	0	0	0	0	0	0		0	0.949367	0	0	0.540541	0	0.274725	0	2.41692	0	0	0.626959		0	0.628931	0	0	0	0.569801	0.242131	0	0	0	0	0.309598	0	0
							0	0	0	0	0	0	0	0		0	0	0	0	0	0.307692	0	0	0	0	0	0.626959		0	0	0.60423	0.638978	0	0.2849	0.242131	0.943396	0	0	0.285714	0	0.649351	0
							0	0	0	0	0	0	0	0.946372		0	0	0.315457	0	0	0	0.549451	0.632911	0	0	0	0.31348		0.23753	0	0	0	0	0	0.726392	0	0	0	0	0	0	0
							0	0	0	0	0	0	0	0		2.76382	1.58228	4.10095	3.42857	2.16216	2.15385	0.549451	1.58228	2.1148	3.25815	0.569801	0.940439		0.712589	0.314465	1.51057	0	3.21543	1.4245	1.93705	0.943396	1.38249	1.53173	1.14286	0	0	0
							0.284091	0.949367	1.31579	6.64452	1.54799	1.96721	1.14613	5.67823		1.00503	1.58228	4.10095	2.28571	2.16216	2.15385	0.549451	0.632911	0.906344	3.50877	1.4245	0		1.42518	0.314465	0.906344	0.958466	2.2508	0.569801	0.242131	2.20126	1.15207	0.875274	0.857143	0	0	0
							0	3.48101	0	4.65116	1.23839	3.60656	1.43266	2.52366		0.502513	0	0	3.14286	0.27027	0.923077	1.0989	0.316456	1.51057	2.50627	0.854701	0.626959		0.712589	0	0.60423	0.958466	0	1.7094	1.45278	0.943396	0.460829	2.62582	1.14286	0.309598	0	1.21212
							0	1.58228	0.986842	4.65116	0.928793	2.29508	0	1.57729		0.753769	1.89873	1.89274	1.14286	0.27027	0.923077	0.274725	1.58228	0.906344	1.00251	0	0		0.475059	0.314465	0.302115	0.319489	0	0	0.484262	1.57233	0.460829	0.218818	0	0	0	0
							0	0.949367	0.328947	0	0	0	0.573066	1.89274		1.00503	3.16456	2.2082	1.71429	1.08108	1.53846	0.824176	1.58228	1.81269	1.00251	1.1396	0.940439		1.42518	1.25786	0.60423	1.91693	1.92926	1.4245	1.69492	2.20126	1.6129	1.75055	1.14286	1.54799	0.324675	0.909091
							0	3.48101	3.61842	3.98671	4.64396	6.22951	0.286533	3.78549		1.50754	3.16456	5.36278	5.42857	7.56757	1.84615	1.64835	3.79747	4.83384	2.50627	3.9886	3.1348		0.712589	0.943396	1.20846	1.59744	1.92926	3.1339	2.42131	4.40252	0.230415	6.12691	3.42857	0.309598	0.649351	0
							0	0.949367	0	0	0	0	0.286533	0.630915		0	2.53165	3.15457	0.285714	0.540541	0	0	2.8481	3.92749	0.75188	2.849	2.50784		1.42518	1.25786	0.302115	0.319489	0.643087	2.5641	1.69492	2.83019	0	0.656455	0.571429	0	0	0
							0	8.86076	0	0	0	0	0	0.315457		0.753769	0	0	0	1.35135	2.46154	4.12088	4.11392	3.32326	1.50376	2.2792	1.88088		1.18765	4.08805	0.906344	1.59744	1.60772	0.854701	1.45278	2.51572	1.6129	3.06346	4	4.95356	3.8961	3.0303
							0	0	0	0	0	0	0	2.52366		0.251256	0.632911	0.315457	0	0.810811	0.615385	1.0989	1.26582	1.81269	0	0	0.626959		0.475059	0.943396	0	0	0.96463	0.2849	0	0	0	0.875274	0.571429	0	0.324675	0
							10.5114	3.79747	0	0	0	0	0	0.630915		3.76884	4.74684	5.04732	1.71429	3.51351	4.61538	7.14286	1.89873	3.92749	3.25815	2.849	4.38871		4.51306	8.1761	4.53172	5.43131	7.07395	3.1339	4.84262	6.60377	2.53456	9.19037	10.8571	8.35913	10.7143	3.63636
							0	0	0	0	0	0	0	0		0	0	0	0	0	1.23077	0.549451	0	0	0.75188	2.5641	0		0	0	0	0	0	0	0	0	0	0	0	0	0	0
							25.8523	7.27848	2.30263	0.332226	6.19195	0	0	0		0.753769	1.26582	2.2082	2	1.08108	1.84615	4.94505	0	3.02115	1.75439	0.854701	1.88088		2.13777	4.08805	2.41692	3.83387	5.46624	2.2792	2.90557	0	0	0	0	0	0	0
							7.95455	4.11392	0.657895	0	0	0	0.286533	0.315457		7.03518	6.96203	10.4101	8.28571	8.37838	8.92308	7.41758	8.86076	8.1571	3.25815	2.849	9.09091		5.46318	9.1195	6.64653	12.1406	10.9325	9.68661	5.32688	6.28931	8.06452	4.59519	2.85714	8.04954	4.87013	0.909091
							17.6136	2.53165	0.986842	0	0	0	0	0.630915		0	0	0	0	0	0	0	0	0	0	0	0		0	0	0	0	0	0	0	0	0	0	0	0	0	0
							0.568182	0	0	0	0	0	0	0		0	0	0	0	0	0	0	0	0	0	0	0		0	0	0	0	0	0	0	0	0	0	0	0	0	0
							2.27273	0	0	0	0	0	0	0		2.76382	5.6962	5.36278	6	3.51351	3.07692	3.84615	4.74684	3.92749	3.50877	4.2735	4.70219		3.32542	2.20126	3.62538	3.83387	5.14469	4.8433	5.08475	6.60377	1.6129	6.78337	6.57143	1.54799	3.24675	11.8182
							0.284091	1.89873	1.31579	0.664452	0.928793	2.62295	2.29226	10.0946		0	0	0	0	0.27027	0.307692	0	0	0	0	0	0		0	0	0	0	0	0	0	0	0	0	0	0	0	0
							0	0	0	0	0	0	0	0		0.251256	0.632911	0	0	1.35135	0.307692	0.274725	2.21519	0	0.501253	0.569801	0.31348		12.5891	1.88679	9.66767	9.90415	2.2508	1.9943	4.60048	4.71698	6.91244	4.15755	3.42857	4.64396	5.84416	1.81818
							0.284091	7.91139	74.6711	48.505	40.8669	61.6393	47.851	0.315457		0	0	0	0	0	0	0	0	0	0	0	0		0	0	0	0	0	0.2849	0	0	0	0.218818	0	0	0	0.909091
							0	0	0	0	0	0	0	0		0	0	0	0	0.27027	0	0	0	0	0.75188	0	0		0	0	0	0	0	0	0	0	0.230415	0	0.285714	0	0.324675	0
							0	0	0	0	0	0	0	2.2082		0	0	0.630915	0.285714	0	0	0	0.316456	0	0	0	0		0	0	0.302115	0.319489	0.643087	0	0.484262	0.628931	0.230415	0	0	0	0	0
							0	0	0	0	0	0	0	0		1.00503	0.949367	0.315457	0.285714	1.35135	0.615385	1.37363	0	0	1.25313	0.2849	1.25392		0.712589	0.628931	0	0.958466	0.96463	0.854701	1.21065	0.943396	0.460829	0.875274	0.285714	0	0.324675	0
							0	0	0	0	0	0	0	1.57729		0	0	0	0	0	0.307692	0	0	0.60423	0.501253	0.569801	0		0.23753	0.314465	0	0	0.643087	1.7094	0.484262	0.628931	0.230415	0.218818	0.571429	0.619195	0.974026	0.606061
							1.70455	0.316456	0.328947	0	0	0	6.30372	0.946372		1.25628	2.53165	2.52366	1.42857	5.67568	2.76923	1.92308	3.79747	3.92749	3.25815	5.98291	8.46395		5.46318	7.2327	6.94864	4.15335	5.14469	7.97721	1.93705	5.03145	0	0	3.71429	0	0.649351	0.909091
							0	0	0	0	0	0	0	1.89274		1.25628	3.16456	1.26183	0	1.08108	1.84615	0.824176	1.26582	1.51057	0.250627	3.7037	2.19436		1.18765	0.943396	0.60423	0.958466	0.643087	0.2849	0	0	1.84332	5.03282	2.57143	0	0.974026	0
							0	0	0	0	0	0	0.286533	0		1.50754	3.79747	2.2082	1.71429	2.7027	1.23077	1.64835	0.632911	1.51057	0	2.2792	2.82132		1.18765	1.57233	1.51057	2.23642	3.21543	2.849	1.45278	0	1.15207	4.814	5.14286	2.47678	4.54545	1.81818
							0.568182	10.7595	4.60526	12.2924	32.1981	5.2459	1.43266	1.57729		0	0	0	0	0	0	0	0	0	0.501253	0	0		0	0	0	0	0	0	0	0	0	0	0	0	0	0
							0	0	0	0	0	0	0	0.315457		0.502513	0.316456	0	0	0	0.307692	0	0	0	0	0.569801	0		0	0	0	0	0	0	0	0	0	0.656455	0.571429	0	0	0
							0	0	0	0	0	0	0.286533	1.26183		5.27638	5.6962	1.26183	5.14286	4.32432	7.07692	7.96703	4.74684	5.43807	4.01003	5.41311	5.01567		4.51306	5.66038	1.20846	5.7508	6.43087	4.8433	6.05327	3.77358	7.14286	3.71991	7.71429	9.59752	4.54545	0
							0	0	0	0	0	0	0	0		0	0.316456	0	0	0.810811	0	0	0	0.302115	0.501253	0.854701	0		0	0	0	0	0.643087	0	0.242131	0.628931	0	0.437637	0.285714	0	0	0
							0	2.8481	0	1.66113	1.23839	0.983607	0.286533	2.2082		1.50754	1.58228	1.89274	1.71429	1.35135	1.84615	1.92308	1.26582	2.71903	1.75439	0.854701	0.626959		1.90024	1.25786	2.1148	0.319489	1.60772	1.1396	1.93705	1.57233	0.230415	0.656455	0.571429	0	0	0
							0	2.8481	0.328947	0	0	0	0	0		0.251256	1.89873	2.83912	2	0.27027	3.07692	1.92308	0.949367	2.41692	2.00501	1.7094	0.31348		2.13777	0.628931	0.60423	0.319489	1.28617	0.569801	2.42131	0.943396	0.460829	0.437637	0.571429	0.309598	0	0
							0.568182	2.21519	0	0.664452	0	0	0	2.2082		1.75879	2.8481	5.04732	2.57143	1.89189	0.923077	0.824176	0.949367	1.81269	2.00501	0	1.5674		3.80048	1.57233	0.906344	0.958466	0.96463	1.1396	0.968523	1.57233	0.460829	0	0.571429	0	0	0
							0	0	0	0	0	0.327869	0	2.2082		0.251256	0.632911	0	0.285714	0.27027	0.615385	0.274725	0.316456	0.60423	0.250627	0	0		0.712589	0	0	0.319489	0.96463	0.2849	0.968523	0.314465	0	0.218818	0	0	0	0
							0	1.58228	0	0	0	0	0	1.26183		1.00503	1.26582	2.52366	1.42857	1.62162	2.15385	0	0.949367	0.906344	0	0	0		0.23753	0	0	0	0.321543	0.2849	0.484262	0.314465	0	0	0	0	0	0
							15.625	3.16456	0	0	0	0	0.286533	0		2.01005	1.26582	1.26183	1.14286	3.24324	1.53846	2.1978	0.316456	0	1.75439	1.4245	0.940439		0.712589	1.57233	0.60423	0.319489	0.643087	0	0.484262	0	0.691244	3.28228	0	0	0	0
							4.26136	0.949367	0	0	0	0	0	0		1.25628	0	2.83912	1.42857	1.08108	1.84615	2.47253	1.26582	0.302115	0.75188	1.4245	0.31348		0.712589	1.25786	0.906344	0.319489	0	0.2849	0.242131	0	0	1.09409	0	0	0	0
							0	0.316456	0	0	0	0	0	0		0	0.316456	0	0	0.27027	0.307692	0	0.316456	0	0	0	0.31348		0.23753	0.314465	0.302115	0	0.96463	0.569801	2.17918	0	0	0	0	0	0	0
							0.284091	0.316456	0	0	1.23839	0	0.859599	1.26183		0	0.632911	0.630915	0.285714	0	0.307692	0.824176	0	2.1148	2.00501	1.1396	0.626959		0	0.314465	0.60423	0.638978	1.28617	0	0.726392	2.20126	0	0	0.285714	0	0	0
							0	0	0	0	0	0	0	0		0	0	0.630915	0	0.27027	0	0	0.316456	0	0	0	0		0	0	0	0	0.321543	0	0.242131	0	0	0	0	0	0	0
							0	0	0	0	0	0	0	0		0	0	0	0	0	0	0	0	0	0	0	0		0	0	0	0	0	0	0	0	0	0	0	0	0	0
							0.284091	0	0	0.332226	0.309598	0	0	0.315457		0.502513	0	1.26183	0.857143	0.27027	0.615385	0.549451	0	0.60423	0.501253	0	0.940439		0.475059	0.314465	0.302115	0	0.321543	0.569801	1.21065	0.943396	0.230415	0	0	0.309598	0	0
							0	0	0	0	0	0	0	0		0	0	0	0	0	0	0	0	0	1.25313	0	0		0	0	0	0	0	0.569801	0	0	0	0	0	0	0	0
							0	0.316456	0	0	0.309598	0	0.573066	0		0	1.58228	2.2082	2.85714	1.08108	2.15385	1.0989	2.21519	1.81269	0.75188	0	2.19436		0	0.314465	0.906344	0	1.60772	0	0.968523	0	0	0	0	0	0	0
							0.568182	0.316456	0	0	0	0	0	0.315457		0.251256	0.949367	3.47003	2	1.62162	2.15385	0.274725	0.316456	0.60423	2.00501	0	1.88088		2.85036	1.25786	0.302115	0.638978	1.92926	0.569801	1.21065	1.88679	0	1.53173	0.285714	0	0	0
							0	0	0	0	0.309598	0	0	0		0	0	0	0	0	0	0	0	0	0	0	0		0	0	0	0	0.321543	0	0	0	0	0	0	0	0	0
							0	0	0	0	0	0	0	0		0	0	0	0	0	0	0	0	0	0	0	0		0	0	0	0	0	0	0	0	0	0	0	0	3.57143	2.42424
							0	0	0	0	0	0	0	3.78549		0	0.316456	0	0.285714	0	0	0	0.316456	0	0	0	0		0	0	0	0	0	0	0	0.314465	0.230415	0	0	0	0	0
							0	0	0	0	0	0	1.7192	1.57729		0.502513	1.26582	0.315457	0	0	0	0	0.316456	0.302115	0.501253	0	0		0	0.314465	0	0.319489	0	0.569801	0	0.628931	0	0.218818	0.285714	0	0.324675	0
							0	0	0	0	0	0	0	0		0	0	0	0	0	0	0	0	0	2.50627	0.2849	0		6.88836	0.628931	0	0	0	0.2849	0	0	0	0	0	0	0	0
							0	0.632911	0	0.332226	0	0.327869	0	2.2082		1.00503	2.8481	1.26183	2.28571	1.89189	1.84615	2.47253	1.26582	1.81269	1.00251	1.1396	1.5674		4.51306	2.51572	2.1148	7.98722	4.18006	3.7037	4.35835	6.60377	1.84332	3.50109	1.42857	0.928793	6.81818	17.5758
							0	0	1.97368	1.66113	0	5.57377	0	0		0.251256	0.632911	0.315457	0	0.27027	0	0	0	0	0	0.569801	0		0	0	0	0	0	0	0	0	0	0	0	0	0	0
							0	0	0	0	0	0	0	0		0	0	0	0	0	0	0	0	0	0	0.2849	0		0	0	0.60423	0	0	0	0.968523	0	0.460829	0	0	1.54799	0.649351	3.33333
							0	0	0	0	0	0	0	5.36278		1.75879	5.06329	2.52366	3.71429	5.94595	2.76923	0.824176	1.58228	2.41692	5.26316	2.5641	1.88088		1.66271	0.943396	0.60423	0.319489	0	0.569801	0	0	0	0	0	0	0	0
							0	0	0	0	0	0	0	2.52366		1.25628	0.949367	0.630915	0	0.810811	0	0	0	0.302115	0.250627	0	0		0	0	0	0	0	0.2849	0	0	0	0	0	0	0	0
							0	2.21519	1.64474	1.99336	1.85759	3.27869	0.573066	4.10095		1.50754	1.89873	1.57729	1.42857	1.08108	0.923077	1.64835	2.21519	1.51057	1.00251	2.5641	1.5674		1.42518	1.57233	1.51057	2.8754	2.2508	1.7094	1.93705	1.88679	0.691244	2.84464	3.71429	0.619195	1.2987	3.93939
							0	0	0	0	0	0	0	0		0	0	0	1.14286	0.540541	0	0.274725	0	0	0	0	0		0	0.314465	0	1.27796	0.321543	0	0	0.628931	9.447	0.437637	0	11.7647	6.81818	5.75758
							0	0	0	0	0	0	0	0.630915		0	0	0	0	0	0	0	0	0	0.501253	0	0.31348		0	0	0	0	0	0	0.968523	0.314465	1.6129	0.437637	0.285714	0.309598	1.62338	2.72727
							0	0	0.986842	0.996678	0	0.655738	0	4.4164		0	0.316456	0.946372	0.285714	0.27027	0	0	1.26582	0	3.25815	1.1396	0		0	0	0	0	0	0	0	0	0	0	0	0	0	0
							0	1.58228	1.64474	0.996678	0	0.327869	0	2.52366		0	0.316456	0.946372	0	0	0	0	0.316456	1.51057	0.250627	2.2792	0		0.712589	0.314465	0	0	0	0	1.69492	0.943396	0	0	0.285714	0	0	0
							0	0	0.657895	0.664452	0	0.655738	0	1.26183		0	0.316456	0.315457	0.571429	0.540541	0	0.274725	1.26582	1.20846	1.50376	0.854701	0		0.712589	0	1.20846	0.958466	0	0.854701	0.968523	0.628931	0	0	0.285714	0	0	0
							0.568182	0	0	0	0	0	0	0		0.251256	0	0	0.285714	2.97297	1.23077	1.92308	0	0.302115	0	0.569801	2.50784		0.712589	0.314465	0	0.319489	0	0	0	0	0	0	0	0	0	0
							0	0	0	0	0	0	0	0		0	0	0	0	0	0	0	0	0	0.250627	0	0		0	0	0	0	0	0	0	0	0	0	0	0	0	0
							0	0	0	0.996678	0.928793	0	0	0		0	0	0	0	0	0	0	0	0	0	0.2849	0		0	0	0	0	0	0	0.242131	0	0	0	0	0	0	0
							0	0	0	0	0	0	0	0		0	0	0	0	0	0	0	0	0	0	0	0		0	0	0	0	0	0	0	0	5.76037	0	0.285714	3.09598	5.84416	12.7273
							0.284091	7.27848	0.657895	0.996678	0	0.983607	0.286533	3.47003		0.753769	1.26582	0.946372	2	0.540541	4.61538	2.47253	0.632911	0	1.50376	1.7094	1.25392		1.90024	0	0.906344	0	0	0.569801	0.726392	1.57233	0	0.656455	0.285714	1.23839	0	0
							0	0	0	0	0	0	0	0		0	0	0	0	0	0	0	0	0	0	0	0		0.950119	0	0.302115	0.638978	0	0.569801	0	0.314465	0	0.437637	0.571429	0	0.324675	0
							0.284091	2.8481	0.657895	1.66113	1.23839	0.327869	0	1.26183		0	0.632911	0.315457	0.285714	1.62162	1.23077	1.92308	0.316456	0.906344	0	0.569801	1.5674		1.90024	0.314465	0.906344	1.27796	0.643087	1.1396	1.21065	1.88679	0.691244	1.75055	0.571429	1.23839	4.54545	5.45455
							0	0	0	4.65116	0	2.62295	30.659	0.946372		0	0	0	0	0	0	0	0.316456	0.302115	1.50376	0	0		0	0	0	0	0	0	0	0	0	0	0	0	0	0
							0	0	0	0	0	0	0	0		0	0	0	0	0	0	0.274725	0	0	0	0	0		0	0	0	0	0	0	0	0	0	0	0	0	0	0
							0	0	0	0	0	0	0	0		0	0	0	0	0	0	0	0	0	0	0.569801	0		0.475059	0.628931	0	0	0	0	0	0	0	0	0	0	0	0
							0	0	0	0	0	0	0	0		0	0	0	0	0	0	0	0	0	1.50376	0	0		0.23753	0	1.20846	1.27796	0.321543	0	2.42131	0.314465	0	0.218818	0	0	0.324675	5.45455
							0	0	0	0	0	0	0	0		0	0	0	0	0	0	0	0	0	0	0	0		0.23753	0	0	0	0	0	0	0	0	0	0	0	0.649351	0
							0	1.58228	0	0	0	0	0	0.315457		1.25628	1.26582	1.57729	1.14286	0.810811	0.923077	0.824176	1.26582	1.20846	0.250627	0.569801	1.25392		0.23753	0.628931	0.60423	0.319489	1.60772	1.1396	0.968523	1.25786	0.460829	1.31291	1.71429	0.309598	0.324675	0.30303
							0.284091	4.43038	0.328947	0.664452	0	0.327869	0.286533	3.47003		0	0	0	0	0	0	0	0	0	0	0	0		0	7.2327	15.4079	0	0.643087	7.69231	3.63196	0	0.460829	0.437637	0	0.309598	0	0
							0.284091	0	0	0	0	0	0	0		0	0	0	0	0	0	0	0	0	0	0	0		0	0.314465	0.302115	0.319489	0.643087	9.68661	0	0	0	0	0	0	0	0
							0	0.316456	0	0	0	0	0	0		36.9347	2.21519	2.2082	14.8571	8.91892	1.23077	3.2967	12.3418	0.302115	1.00251	11.9658	7.21003		0	5.03145	15.1057	2.23642	0	0.2849	2.17918	5.97484	20.9677	10.2845	9.14286	14.5511	12.6623	8.78788
							8.80682	1.89873	0	0	0	0	0	0.315457		0	0.316456	0.315457	1.14286	0	0	0.549451	0.949367	1.81269	4.01003	0.854701	1.88088		0	0.314465	0.906344	0.319489	1.28617	0.2849	0.242131	1.57233	0.460829	0.437637	0	0	0	0
							0	0.316456	0	0	0.928793	0	0.573066	1.89274		0	0.632911	0.946372	1.14286	0.810811	0.307692	0.824176	0.316456	1.51057	2.00501	0.569801	1.25392		1.18765	0.628931	1.51057	0.319489	0.643087	0.2849	0.242131	0.314465	0	0.437637	0.857143	0	0	0
							0	1.26582	0	0	3.09598	0	0.573066	2.52366		0.753769	1.58228	0.946372	0.857143	1.62162	1.23077	0.549451	3.48101	0	1.25313	3.9886	3.1348		1.90024	2.20126	0.906344	0	0.321543	0.569801	0.242131	0	0	0.437637	0	0	0	0
							0	1.89873	0	0	0	0	0.286533	0.630915		0.251256	0	0.315457	0	0	0	0	0	0	0	0	0.31348		0	0	0	0	0	0	0	0	0	0	0	0	0	0
							0	0	0	0	0	0	0.573066	5.36278		8.0402	5.6962	2.2082	5.14286	2.16216	8.61538	8.24176	5.37975	6.0423	10.7769	7.69231	6.58307		4.98812	5.66038	2.41692	7.34824	5.46624	4.8433	6.77966	5.66038	8.75576	4.59519	6.85714	11.4551	7.14286	1.51515
							0	0	0	0	0	0	0	0		2.01005	6.01266	3.15457	0.857143	2.7027	7.69231	8.24176	7.59494	6.34441	2.00501	3.9886	3.76176		2.85036	4.40252	0.906344	4.79233	3.21543	3.4188	4.35835	3.14465	5.52995	3.06346	4.57143	9.28793	4.22078	2.42424
							0	0	0	0	0	0	0	0		0.753769	1.89873	0.946372	1.71429	1.89189	2.46154	4.12088	2.8481	1.81269	2.75689	1.1396	1.25392		2.3753	5.03145	0.60423	5.43131	4.18006	1.9943	4.60048	1.57233	3.22581	2.84464	8.57143	0	0	0
							0	0	0	0	0	0	0	0		0	0	0	0	0.27027	0	0	0	0.60423	0	0.569801	0.626959		0.23753	0	0	0	0	0	0	0.314465	0	0	0	0	0	0
