# Supplementary material for: Albian to Turonian agglutinated foraminiferal assemblages of the Lower Saxony Cretaceous sub-basins – implications for sequence stratigraphy and paleoenvironmental interpretation
Source: Copernicus journal article supplement (doi:10.5194/fr-24-395-2021), 2021-12-17
Supplement: Supplementary file 3 [file table s3.xlsx]

## Sheet: Baddeckenstedt section
Baddeckenstedt quarry section
section m	41	39	37	35	32	26	24	21.8	19.3	17.3	15	13	10	7	5.5	4	2	0
Agathamminoides serpens	0	0	1	0	0	0	0	1	0	0	0	0	0	0	0	0	0	0
Ammobaculites agglutinans	1	3	2	5	2	0	0	2	3	1	3	8	1	2	1	3	8	0
Ammodiscus cretaceus	11	7	11	23	14	2	14	9	3	0	4	2	0	2	1	0	4	0
Ammodiscus glabratus	3	8	6	9	4	0	4	4	3	0	1	2	0	1	0	0	0	0
Ammodiscus peruvianus	0	0	0	4	2	0	3	2	0	0	2	1	0	1	3	0	0	0
Ammodiscus tenuissimus	0	0	1	2	2	2	1	1	1	0	4	0	0	0	0	0	1	0
Ammolagena clavata	14	13	29	15	17	4	8	17	5	1	11	1	0	0	2	2	0	2
Ammolagena contorta	12	12	30	30	9	15	10	14	8	0	9	8	0	1	9	2	9	3
Arenobulimina barnardi	2	1	1	1	5	4	3	3	5	9	4	5	8	6	9	6	1	8
Arenobulimina bochumensis	0	0	0	2	1	2	1	1	1	0	0	2	0	0	2	0	2	2
Arenobulimina preslii	1	1	0	0	7	4	2	4	5	11	14	13	6	22	9	13	14	9
Arenobulimina spp.	0	4	1	0	5	0	4	9	10	15	17	2	7	8	5	2	4	20
Arenobulimina truncata	7	0	0	1	12	12	14	14	11	14	11	18	14	30	22	14	8	15
Astrorhiza sp.	0	0	1	0	0	0	0	0	0	0	0	0	0	0	0	0	0	0
Ataxophragmium compactum	0	0	0	0	0	0	0	0	0	0	0	0	0	0	0	0	0	2
Ataxophragmium depressum	0	0	0	0	1	0	0	4	1	2	4	4	6	8	6	5	7	3
Bathysiphon spp.	11	17	13	7	5	2	12	15	7	1	10	6	1	2	3	1	3	2
Bicazammina lagenaria	0	1	0	1	0	0	0	0	0	0	1	1	0	0	0	0	0	0
Bulbobaculites problematicus	0	2	0	0	0	0	0	0	0	1	0	0	0	0	0	0	0	0
Caudammina ovula	10	6	8	4	4	2	1	6	4	0	4	0	0	0	2	2	4	1
Caudammina ovuloides	1	0	1	0	1	0	0	0	0	0	0	0	0	0	1	1	0	0
Clavulinoides sp.	0	0	0	0	1	4	0	0	1	1	1	1	0	1	4	0	1	0
Dolgenia pennyi	1	0	0	2	0	0	0	1	0	0	2	0	0	0	0	0	0	0
Eggerellina brevis	18	10	8	12	29	12	19	22	48	21	15	16	7	5	5	16	6	6
Eggerellina mariae	27	15	19	13	11	23	22	28	35	8	29	8	4	7	14	8	7	4
Eobigenerina kuhnti	0	0	0	0	0	0	0	0	0	0	1	0	0	0	0	0	0	0
Eobigenerina variabilis	2	0	0	3	0	0	1	0	0	0	4	1	0	0	0	0	0	0
Flourensina intermedia	0	0	16	2	7	1	1	1	0	5	0	0	0	0	0	0	0	2
Gaudryina sp. 1	4	13	6	7	5	11	5	9	4	3	8	5	8	2	2	5	8	3
Gaudryinopsis filiformis	1	5	4	1	1	0	1	3	1	0	2	1	1	0	4	2	5	2
Gerochammina stanislawi	5	6	7	19	6	3	8	2	0	0	0	0	0	0	0	0	0	0
Glomospira diffundens	1	1	2	2	1	0	0	0	0	0	1	0	0	0	0	0	1	0
Glomospira gordialis	4	10	9	4	4	0	3	10	2	0	4	4	0	1	1	0	0	1
Glomospira irregularis	2	3	2	1	2	0	2	0	0	0	1	0	0	0	0	0	1	0
Hagenowella elevata	4	1	0	3	9	8	9	12	18	17	13	15	5	20	19	9	12	13
Hagenowella obesa	0	0	0	0	7	3	2	4	3	8	7	11	5	11	7	5	9	8
Haplophragmoides eggeri	0	9	3	4	4	0	5	1	3	0	6	1	0	0	0	0	0	1
Haplophragmoides sp.	0	0	0	0	0	0	0	0	0	0	0	0	0	1	0	1	0	0
Haplophragmoides stomatus	0	0	3	0	1	1	0	0	0	0	0	0	0	0	0	0	0	0
Haplophragmoides suborbicularis	1	1	4	5	2	3	5	1	0	0	0	0	0	0	0	0	0	0
Haplophragmoides walteri	1	3	0	3	1	0	1	4	0	0	0	0	0	2	0	0	0	0
Hemisphaerammina batalleri	0	0	2	0	0	0	0	0	0	0	1	0	0	0	0	0	1	0
Hemisphaerammina glandiformis	0	0	0	0	0	0	0	0	0	0	1	2	0	1	1	0	0	1
Hormosinella fusiformis	0	0	0	0	0	0	0	0	0	0	1	1	0	2	4	1	1	1
Hormosinelloides guttifer	0	0	0	2	1	0	1	0	1	0	0	0	0	0	0	0	0	0
Hyperammina gaultina	0	0	0	0	0	0	0	1	0	0	1	0	0	0	2	0	0	0
Kadriayina gradata	9	3	19	0	4	15	6	1	0	3	4	2	5	4	1	2	3	5
Kalamopsis grzybowskii	0	0	0	0	0	0	1	0	0	0	0	0	0	0	0	0	0	0
Kechenotiske sp.	0	1	2	0	1	0	0	0	0	0	0	1	0	0	0	0	0	0
Lagenammina difflugiformis	0	0	0	0	0	0	0	0	1	1	2	5	0	2	5	1	0	0
Lituotuba lituiformis	1	3	1	0	1	1	2	9	0	0	0	0	0	0	0	0	0	1
Marssonella ozawai	0	0	0	0	0	0	0	0	0	0	0	3	0	0	0	0	0	39
Nothia robusta	1	0	3	0	1	0	0	0	0	0	0	0	0	0	0	0	0	0
Nothia spp.	8	7	9	4	4	1	6	9	3	1	5	3	1	2	1	1	2	1
Parvigenerina sp. 3	0	0	0	0	0	0	0	1	0	1	0	0	0	0	0	0	0	0
Placentammina cf. placenta	0	1	2	1	0	0	0	0	2	0	0	0	0	0	0	1	0	1
Placopsilina cenomana	0	0	0	0	1	0	0	0	0	0	0	0	0	0	0	0	0	1
Plectina cenomana	28	22	24	9	26	23	16	8	15	19	25	19	15	21	14	23	25	13
Plectina mariae	5	8	7	6	15	12	7	1	1	5	7	3	5	6	1	5	4	4
Psammosiphonella sp.	14	7	8	4	5	1	10	10	7	3	8	8	2	3	2	2	3	2
Psammosphaera fusca	0	0	0	0	2	0	1	3	0	2	0	1	0	1	1	2	1	0
Psammosphaera irregularis	2	4	5	9	4	0	7	8	4	2	5	6	0	3	1	2	1	1
Pseudonodosinella nodulosa	20	10	1	3	2	0	0	9	3	0	0	0	0	0	0	0	0	0
Pseudonodosinella parvula	1	3	0	0	2	0	0	2	0	0	0	0	0	0	0	0	1	0
Pseudonodosinella troyeri	7	10	1	4	4	0	2	3	1	0	1	1	0	0	0	0	1	0
Pseudotextulariella cretosa	0	0	0	0	0	0	1	3	7	14	7	14	15	11	8	20	20	19
Recurvoides sp.	0	1	0	1	1	3	4	0	0	0	0	0	0	0	0	0	0	0
Reophax cf. globolus	0	0	0	0	0	0	0	1	0	0	4	3	0	2	2	4	3	0
Reophax scorpiurus	0	0	0	0	0	0	0	0	0	0	0	0	1	1	0	0	1	1
Reophax subfusiformis	0	0	0	0	0	0	0	2	0	1	1	4	0	0	1	3	0	1
Repmanina charoides	12	26	10	15	8	1	1	4	0	0	4	1	0	2	0	0	1	0
Rhabdammina sp.	1	0	0	1	1	0	1	1	1	0	1	1	0	1	0	0	0	1
Rzehakina minima	0	0	0	0	0	0	1	0	0	0	0	1	0	0	0	0	0	0
Saccammina grzybowskii	0	1	0	0	1	0	0	2	0	4	1	4	0	1	2	3	1	3
Spiroplectammina navarroana	11	12	1	27	11	0	3	3	0	0	2	0	0	0	0	0	0	0
Spiroplectinella cretosa	0	0	0	0	0	0	0	0	1	3	2	1	2	5	2	5	8	0
Subbdelloidina haeusleri	0	0	0	0	0	0	0	0	0	1	1	0	2	0	4	0	1	24
Subreophax scalaris	0	1	0	0	0	0	0	0	0	0	1	1	0	0	0	0	0	0
Textulariopsis rioensis	0	0	0	0	0	0	1	0	0	0	0	0	0	0	0	0	0	0
Tipeammina elliptica	0	0	0	0	0	1	1	0	0	0	0	0	0	0	1	0	0	0
Tipeammina sp. 1	1	3	2	0	0	3	1	3	0	0	1	0	0	0	0	1	3	0
Tolypammina sp.	1	1	1	1	2	0	1	1	1	0	1	1	1	1	0	1	0	1
Tritaxia tricarinata	8	2	9	2	30	89	6	3	20	52	2	56	157	56	65	81	61	23
Trochammina spp.	1	3	4	7	4	0	4	1	4	0	4	1	0	1	1	0	4	0
Trochamminoides spp.	4	11	11	19	13	5	13	15	14	1	12	4	2	2	4	0	2	0
Verneuilinoides spp.	2	6	1	14	2	0	1	1	0	1	4	0	0	1	1	0	0	1
Vialovella frankei	18	40	0	24	27	33	18	30	25	53	53	14	16	25	22	18	15	12
Voloshinoides advenus	3	5	0	1	4	8	10	12	5	14	24	11	16	20	18	23	18	24
Voloshinoides anglicus	0	0	0	0	4	7	17	9	11	7	9	17	7	23	12	10	13	13
Voloshinoides d'orbignyi	2	0	0	0	3	2	0	1	1	0	0	0	0	0	0	0	0	0
Fisher-Alpha Index	15.55	15.64	14.91	15.26	20.06	10.38	19.62	20.03	14.01	10.06	19.85	17.97	7.384	14.08	15.48	11.86	14.96	14.21
Species richness	47	49	46	48	61	36	55	59	44	36	60	53	28	45	47	39	46	44
Morphogroups in %
M1	11.8	9.3	10.9	5	4.9	1.2	10.2	10	6.1	1.6	6.4	5.8	1.6	2.7	2	1.6	2.6	2.3
M2a	4.3	3.8	6.4	4.1	3.6	0.9	3.3	5.5	3.5	2.9	3.6	5.2	0	2.1	4.9	3.9	2.6	2
M2b	0.3	0.9	1.3	2.1	1.4	0	1.3	1.4	1.6	0.7	2.1	1.5	1.9	2.7	2.3	1.6	3.6	1.7
M2c	3.6	3.5	0.3	8	3	0	1.3	0.8	0.3	1	1	0.3	0.6	1.5	0.7	1.6	2.6	0
M3a	11.5	16.9	14.1	18.3	10.1	2.5	9.9	9.7	2.9	0	6.4	4	0	2.4	2	0.3	3.6	0.7
M3b	8.9	8.2	19.6	13.3	7.7	6.2	6.6	11.1	4.2	0.3	5.2	2.8	0	0.3	3.6	1.3	2.9	2.3
M3c	1.3	3.5	3.5	5.9	3.8	2.5	5.6	4.2	4.5	0.3	3.1	1.2	0.6	0.6	1.3	0	0.6	0
M4a	0.7	3.8	3.2	3.5	2.2	1.2	3.6	1.7	1	0	1.5	0.3	0	0.9	0	0.3	0	0.3
M4b	57.6	50.1	40.5	39.8	63.4	85.4	58.2	55.7	75.8	93.1	70.6	78.8	95.3	86.7	83.4	89.2	81.6	90.7
Counted specimens	304	343	311	339	366	323	304	361	310	306	388	325	320	330	307	306	309	300
Relative abundances in %
Agathamminoides serpens	0	0	0.321543	0	0	0	0	0.277008	0	0	0	0	0	0	0	0	0	0
Ammobaculites agglutinans	0.328947	0.874636	0.643087	1.47493	0.546448	0	0	0.554017	0.967742	0.326797	0.773196	2.46154	0.3125	0.606061	0.325733	0.980392	2.589	0
Ammodiscus cretaceus	3.61842	2.04082	3.53698	6.78466	3.82514	0.619195	4.60526	2.49307	0.967742	0	1.03093	0.615385	0	0.606061	0.325733	0	1.2945	0
Ammodiscus glabratus	0.986842	2.33236	1.92926	2.65487	1.0929	0	1.31579	1.10803	0.967742	0	0.257732	0.615385	0	0.30303	0	0	0	0
Ammodiscus peruvianus	0	0	0	1.17994	0.546448	0	0.986842	0.554017	0	0	0.515464	0.307692	0	0.30303	0.977199	0	0	0
Ammodiscus tenuissimus	0	0	0.321543	0.589971	0.546448	0.619195	0.328947	0.277008	0.322581	0	1.03093	0	0	0	0	0	0.323625	0
Ammolagena clavata	4.60526	3.79009	9.32476	4.42478	4.64481	1.23839	2.63158	4.70914	1.6129	0.326797	2.83505	0.307692	0	0	0.651466	0.653595	0	0.666667
Ammolagena contorta	3.94737	3.49854	9.6463	8.84956	2.45902	4.64396	3.28947	3.87812	2.58065	0	2.31959	2.46154	0	0.30303	2.9316	0.653595	2.91262	1
Arenobulimina barnardi	0.657895	0.291545	0.321543	0.294985	1.36612	1.23839	0.986842	0.831025	1.6129	2.94118	1.03093	1.53846	2.5	1.81818	2.9316	1.96078	0.323625	2.66667
Arenobulimina bochumensis	0	0	0	0.589971	0.273224	0.619195	0.328947	0.277008	0.322581	0	0	0.615385	0	0	0.651466	0	0.647249	0.666667
Arenobulimina preslii	0.328947	0.291545	0	0	1.91257	1.23839	0.657895	1.10803	1.6129	3.59477	3.60825	4	1.875	6.66667	2.9316	4.24837	4.53074	3
Arenobulimina spp.	0	1.16618	0.321543	0	1.36612	0	1.31579	2.49307	3.22581	4.90196	4.38144	0.615385	2.1875	2.42424	1.62866	0.653595	1.2945	6.66667
Arenobulimina truncata	2.30263	0	0	0.294985	3.27869	3.71517	4.60526	3.87812	3.54839	4.57516	2.83505	5.53846	4.375	9.09091	7.16612	4.57516	2.589	5
Astrorhiza sp.	0	0	0.321543	0	0	0	0	0	0	0	0	0	0	0	0	0	0	0
Ataxophragmium compactum	0	0	0	0	0	0	0	0	0	0	0	0	0	0	0	0	0	0.666667
Ataxophragmium depressum	0	0	0	0	0.273224	0	0	1.10803	0.322581	0.653595	1.03093	1.23077	1.875	2.42424	1.9544	1.63399	2.26537	1
Bathysiphon spp.	3.61842	4.95627	4.18006	2.0649	1.36612	0.619195	3.94737	4.15512	2.25806	0.326797	2.57732	1.84615	0.3125	0.606061	0.977199	0.326797	0.970874	0.666667
Bicazammina lagenaria	0	0.291545	0	0.294985	0	0	0	0	0	0	0.257732	0.307692	0	0	0	0	0	0
Bulbobaculites problematicus	0	0.58309	0	0	0	0	0	0	0	0.326797	0	0	0	0	0	0	0	0
Caudammina ovula	3.28947	1.74927	2.57235	1.17994	1.0929	0.619195	0.328947	1.66205	1.29032	0	1.03093	0	0	0	0.651466	0.653595	1.2945	0.333333
Caudammina ovuloides	0.328947	0	0.321543	0	0.273224	0	0	0	0	0	0	0	0	0	0.325733	0.326797	0	0
Clavulinoides sp.	0	0	0	0	0.273224	1.23839	0	0	0.322581	0.326797	0.257732	0.307692	0	0.30303	1.30293	0	0.323625	0
Dolgenia pennyi	0.328947	0	0	0.589971	0	0	0	0.277008	0	0	0.515464	0	0	0	0	0	0	0
Eggerellina brevis	5.92105	2.91545	2.57235	3.53982	7.9235	3.71517	6.25	6.09418	15.4839	6.86275	3.86598	4.92308	2.1875	1.51515	1.62866	5.22876	1.94175	2
Eggerellina mariae	8.88158	4.37318	6.10932	3.83481	3.00546	7.12074	7.23684	7.75623	11.2903	2.61438	7.47423	2.46154	1.25	2.12121	4.56026	2.61438	2.26537	1.33333
Eobigenerina kuhnti	0	0	0	0	0	0	0	0	0	0	0.257732	0	0	0	0	0	0	0
Eobigenerina variabilis	0.657895	0	0	0.884956	0	0	0.328947	0	0	0	1.03093	0.307692	0	0	0	0	0	0
Flourensina intermedia	0	0	5.14469	0.589971	1.91257	0.309598	0.328947	0.277008	0	1.63399	0	0	0	0	0	0	0	0.666667
Gaudryina sp. 1	1.31579	3.79009	1.92926	2.0649	1.36612	3.40557	1.64474	2.49307	1.29032	0.980392	2.06186	1.53846	2.5	0.606061	0.651466	1.63399	2.589	1
Gaudryinopsis filiformis	0.328947	1.45773	1.28617	0.294985	0.273224	0	0.328947	0.831025	0.322581	0	0.515464	0.307692	0.3125	0	1.30293	0.653595	1.61812	0.666667
Gerochammina stanislawi	1.64474	1.74927	2.2508	5.60472	1.63934	0.928793	2.63158	0.554017	0	0	0	0	0	0	0	0	0	0
Glomospira diffundens	0.328947	0.291545	0.643087	0.589971	0.273224	0	0	0	0	0	0.257732	0	0	0	0	0	0.323625	0
Glomospira gordialis	1.31579	2.91545	2.89389	1.17994	1.0929	0	0.986842	2.77008	0.645161	0	1.03093	1.23077	0	0.30303	0.325733	0	0	0.333333
Glomospira irregularis	0.657895	0.874636	0.643087	0.294985	0.546448	0	0.657895	0	0	0	0.257732	0	0	0	0	0	0.323625	0
Hagenowella elevata	1.31579	0.291545	0	0.884956	2.45902	2.47678	2.96053	3.3241	5.80645	5.55556	3.35052	4.61538	1.5625	6.06061	6.18893	2.94118	3.8835	4.33333
Hagenowella obesa	0	0	0	0	1.91257	0.928793	0.657895	1.10803	0.967742	2.61438	1.80412	3.38462	1.5625	3.33333	2.28013	1.63399	2.91262	2.66667
Haplophragmoides eggeri	0	2.62391	0.96463	1.17994	1.0929	0	1.64474	0.277008	0.967742	0	1.54639	0.307692	0	0	0	0	0	0.333333
Haplophragmoides sp.	0	0	0	0	0	0	0	0	0	0	0	0	0	0.30303	0	0.326797	0	0
Haplophragmoides stomatus	0	0	0.96463	0	0.273224	0.309598	0	0	0	0	0	0	0	0	0	0	0	0
Haplophragmoides suborbicularis	0.328947	0.291545	1.28617	1.47493	0.546448	0.928793	1.64474	0.277008	0	0	0	0	0	0	0	0	0	0
Haplophragmoides walteri	0.328947	0.874636	0	0.884956	0.273224	0	0.328947	1.10803	0	0	0	0	0	0.606061	0	0	0	0
Hemisphaerammina batalleri	0	0	0.643087	0	0	0	0	0	0	0	0.257732	0	0	0	0	0	0.323625	0
Hemisphaerammina glandiformis	0	0	0	0	0	0	0	0	0	0	0.257732	0.615385	0	0.30303	0.325733	0	0	0.333333
Hormosinella fusiformis	0	0	0	0	0	0	0	0	0	0	0.257732	0.307692	0	0.606061	1.30293	0.326797	0.323625	0.333333
Hormosinelloides guttifer	0	0	0	0.589971	0.273224	0	0.328947	0	0.322581	0	0	0	0	0	0	0	0	0
Hyperammina gaultina	0	0	0	0	0	0	0	0.277008	0	0	0.257732	0	0	0	0.651466	0	0	0
Kadriayina gradata	2.96053	0.874636	6.10932	0	1.0929	4.64396	1.97368	0.277008	0	0.980392	1.03093	0.615385	1.5625	1.21212	0.325733	0.653595	0.970874	1.66667
Kalamopsis grzybowskii	0	0	0	0	0	0	0.328947	0	0	0	0	0	0	0	0	0	0	0
Kechenotiske sp.	0	0.291545	0.643087	0	0.273224	0	0	0	0	0	0	0.307692	0	0	0	0	0	0
Lagenammina difflugiformis	0	0	0	0	0	0	0	0	0.322581	0.326797	0.515464	1.53846	0	0.606061	1.62866	0.326797	0	0
Lituotuba lituiformis	0.328947	0.874636	0.321543	0	0.273224	0.309598	0.657895	2.49307	0	0	0	0	0	0	0	0	0	0.333333
Marssonella ozawai	0	0	0	0	0	0	0	0	0	0	0	0.923077	0	0	0	0	0	13
Nothia robusta	0.328947	0	0.96463	0	0.273224	0	0	0	0	0	0	0	0	0	0	0	0	0
Nothia spp.	2.63158	2.04082	2.89389	1.17994	1.0929	0.309598	1.97368	2.49307	0.967742	0.326797	1.28866	0.923077	0.3125	0.606061	0.325733	0.326797	0.647249	0.333333
Parvigenerina sp. 3	0	0	0	0	0	0	0	0.277008	0	0.326797	0	0	0	0	0	0	0	0
Placentammina cf. placenta	0	0.291545	0.643087	0.294985	0	0	0	0	0.645161	0	0	0	0	0	0	0.326797	0	0.333333
Placopsilina cenomana	0	0	0	0	0.273224	0	0	0	0	0	0	0	0	0	0	0	0	0.333333
Plectina cenomana	9.21053	6.41399	7.71704	2.65487	7.10383	7.12074	5.26316	2.21607	4.83871	6.20915	6.4433	5.84615	4.6875	6.36364	4.56026	7.51634	8.09061	4.33333
Plectina mariae	1.64474	2.33236	2.2508	1.76991	4.09836	3.71517	2.30263	0.277008	0.322581	1.63399	1.80412	0.923077	1.5625	1.81818	0.325733	1.63399	1.2945	1.33333
Psammosiphonella sp.	4.60526	2.04082	2.57235	1.17994	1.36612	0.309598	3.28947	2.77008	2.25806	0.980392	2.06186	2.46154	0.625	0.909091	0.651466	0.653595	0.970874	0.666667
Psammosphaera fusca	0	0	0	0	0.546448	0	0.328947	0.831025	0	0.653595	0	0.307692	0	0.30303	0.325733	0.653595	0.323625	0
Psammosphaera irregularis	0.657895	1.16618	1.60772	2.65487	1.0929	0	2.30263	2.21607	1.29032	0.653595	1.28866	1.84615	0	0.909091	0.325733	0.653595	0.323625	0.333333
Pseudonodosinella nodulosa	6.57895	2.91545	0.321543	0.884956	0.546448	0	0	2.49307	0.967742	0	0	0	0	0	0	0	0	0
Pseudonodosinella parvula	0.328947	0.874636	0	0	0.546448	0	0	0.554017	0	0	0	0	0	0	0	0	0.323625	0
Pseudonodosinella troyeri	2.30263	2.91545	0.321543	1.17994	1.0929	0	0.657895	0.831025	0.322581	0	0.257732	0.307692	0	0	0	0	0.323625	0
Pseudotextulariella cretosa	0	0	0	0	0	0	0.328947	0.831025	2.25806	4.57516	1.80412	4.30769	4.6875	3.33333	2.60586	6.53595	6.47249	6.33333
Recurvoides sp.	0	0.291545	0	0.294985	0.273224	0.928793	1.31579	0	0	0	0	0	0	0	0	0	0	0
Reophax cf. globolus	0	0	0	0	0	0	0	0.277008	0	0	1.03093	0.923077	0	0.606061	0.651466	1.30719	0.970874	0
Reophax scorpiurus	0	0	0	0	0	0	0	0	0	0	0	0	0.3125	0.30303	0	0	0.323625	0.333333
Reophax subfusiformis	0	0	0	0	0	0	0	0.554017	0	0.326797	0.257732	1.23077	0	0	0.325733	0.980392	0	0.333333
Repmanina charoides	3.94737	7.58017	3.21543	4.42478	2.18579	0.309598	0.328947	1.10803	0	0	1.03093	0.307692	0	0.606061	0	0	0.323625	0
Rhabdammina sp.	0.328947	0	0	0.294985	0.273224	0	0.328947	0.277008	0.322581	0	0.257732	0.307692	0	0.30303	0	0	0	0.333333
Rzehakina minima	0	0	0	0	0	0	0.328947	0	0	0	0	0.307692	0	0	0	0	0	0
Saccammina grzybowskii	0	0.291545	0	0	0.273224	0	0	0.554017	0	1.30719	0.257732	1.23077	0	0.30303	0.651466	0.980392	0.323625	1
Spiroplectammina navarroana	3.61842	3.49854	0.321543	7.9646	3.00546	0	0.986842	0.831025	0	0	0.515464	0	0	0	0	0	0	0
Spiroplectinella cretosa	0	0	0	0	0	0	0	0	0.322581	0.980392	0.515464	0.307692	0.625	1.51515	0.651466	1.63399	2.589	0
Subbdelloidina haeusleri	0	0	0	0	0	0	0	0	0	0.326797	0.257732	0	0.625	0	1.30293	0	0.323625	8
Subreophax scalaris	0	0.291545	0	0	0	0	0	0	0	0	0.257732	0.307692	0	0	0	0	0	0
Textulariopsis rioensis	0	0	0	0	0	0	0.328947	0	0	0	0	0	0	0	0	0	0	0
Tipeammina elliptica	0	0	0	0	0	0.309598	0.328947	0	0	0	0	0	0	0	0.325733	0	0	0
Tipeammina sp. 1	0.328947	0.874636	0.643087	0	0	0.928793	0.328947	0.831025	0	0	0.257732	0	0	0	0	0.326797	0.970874	0
Tolypammina sp.	0.328947	0.291545	0.321543	0.294985	0.546448	0	0.328947	0.277008	0.322581	0	0.257732	0.307692	0.3125	0.30303	0	0.326797	0	0.333333
Tritaxia tricarinata	2.63158	0.58309	2.89389	0.589971	8.19672	27.5542	1.97368	0.831025	6.45161	16.9935	0.515464	17.2308	49.0625	16.9697	21.1726	26.4706	19.7411	7.66667
Trochammina spp.	0.328947	0.874636	1.28617	2.0649	1.0929	0	1.31579	0.277008	1.29032	0	1.03093	0.307692	0	0.30303	0.325733	0	1.2945	0
Trochamminoides spp.	1.31579	3.207	3.53698	5.60472	3.55191	1.54799	4.27632	4.15512	4.51613	0.326797	3.09278	1.23077	0.625	0.606061	1.30293	0	0.647249	0
Verneuilinoides spp.	0.657895	1.74927	0.321543	4.12979	0.546448	0	0.328947	0.277008	0	0.326797	1.03093	0	0	0.30303	0.325733	0	0	0.333333
Vialovella frankei	5.92105	11.6618	0	7.07965	7.37705	10.2167	5.92105	8.31025	8.06452	17.3203	13.6598	4.30769	5	7.57576	7.16612	5.88235	4.85437	4
Voloshinoides advenus	0.986842	1.45773	0	0.294985	1.0929	2.47678	3.28947	3.3241	1.6129	4.57516	6.18557	3.38462	5	6.06061	5.86319	7.51634	5.82524	8
Voloshinoides anglicus	0	0	0	0	1.0929	2.16718	5.59211	2.49307	3.54839	2.28758	2.31959	5.23077	2.1875	6.9697	3.90879	3.26797	4.20712	4.33333
Voloshinoides d'orbignyi	0.657895	0	0	0	0.819672	0.619195	0	0.277008	0.322581	0	0	0	0	0	0	0	0	0
	0	0	0.321543	0	0	0	0	0.277008	0	0	0	0	0	0	0	0	0	0
	0.328947	0.874636	0.643087	1.47493	0.546448	0	0	0.554017	0.967742	0.326797	0.773196	2.46154	0.3125	0.606061	0.325733	0.980392	2.589	0
	3.61842	2.04082	3.53698	6.78466	3.82514	0.619195	4.60526	2.49307	0.967742	0	1.03093	0.615385	0	0.606061	0.325733	0	1.2945	0
	0.986842	2.33236	1.92926	2.65487	1.0929	0	1.31579	1.10803	0.967742	0	0.257732	0.615385	0	0.30303	0	0	0	0
	0	0	0	1.17994	0.546448	0	0.986842	0.554017	0	0	0.515464	0.307692	0	0.30303	0.977199	0	0	0
	0	0	0.321543	0.589971	0.546448	0.619195	0.328947	0.277008	0.322581	0	1.03093	0	0	0	0	0	0.323625	0
	4.60526	3.79009	9.32476	4.42478	4.64481	1.23839	2.63158	4.70914	1.6129	0.326797	2.83505	0.307692	0	0	0.651466	0.653595	0	0.666667
	3.94737	3.49854	9.6463	8.84956	2.45902	4.64396	3.28947	3.87812	2.58065	0	2.31959	2.46154	0	0.30303	2.9316	0.653595	2.91262	1
	0.657895	0.291545	0.321543	0.294985	1.36612	1.23839	0.986842	0.831025	1.6129	2.94118	1.03093	1.53846	2.5	1.81818	2.9316	1.96078	0.323625	2.66667
	0	0	0	0.589971	0.273224	0.619195	0.328947	0.277008	0.322581	0	0	0.615385	0	0	0.651466	0	0.647249	0.666667
	0.328947	0.291545	0	0	1.91257	1.23839	0.657895	1.10803	1.6129	3.59477	3.60825	4	1.875	6.66667	2.9316	4.24837	4.53074	3
	0	1.16618	0.321543	0	1.36612	0	1.31579	2.49307	3.22581	4.90196	4.38144	0.615385	2.1875	2.42424	1.62866	0.653595	1.2945	6.66667
	2.30263	0	0	0.294985	3.27869	3.71517	4.60526	3.87812	3.54839	4.57516	2.83505	5.53846	4.375	9.09091	7.16612	4.57516	2.589	5
	0	0	0.321543	0	0	0	0	0	0	0	0	0	0	0	0	0	0	0
	0	0	0	0	0	0	0	0	0	0	0	0	0	0	0	0	0	0.666667
	0	0	0	0	0.273224	0	0	1.10803	0.322581	0.653595	1.03093	1.23077	1.875	2.42424	1.9544	1.63399	2.26537	1
	3.61842	4.95627	4.18006	2.0649	1.36612	0.619195	3.94737	4.15512	2.25806	0.326797	2.57732	1.84615	0.3125	0.606061	0.977199	0.326797	0.970874	0.666667
	0	0.291545	0	0.294985	0	0	0	0	0	0	0.257732	0.307692	0	0	0	0	0	0
	0	0.58309	0	0	0	0	0	0	0	0.326797	0	0	0	0	0	0	0	0
	3.28947	1.74927	2.57235	1.17994	1.0929	0.619195	0.328947	1.66205	1.29032	0	1.03093	0	0	0	0.651466	0.653595	1.2945	0.333333
	0.328947	0	0.321543	0	0.273224	0	0	0	0	0	0	0	0	0	0.325733	0.326797	0	0
	0	0	0	0	0.273224	1.23839	0	0	0.322581	0.326797	0.257732	0.307692	0	0.30303	1.30293	0	0.323625	0
	0.328947	0	0	0.589971	0	0	0	0.277008	0	0	0.515464	0	0	0	0	0	0	0
	5.92105	2.91545	2.57235	3.53982	7.9235	3.71517	6.25	6.09418	15.4839	6.86275	3.86598	4.92308	2.1875	1.51515	1.62866	5.22876	1.94175	2
	8.88158	4.37318	6.10932	3.83481	3.00546	7.12074	7.23684	7.75623	11.2903	2.61438	7.47423	2.46154	1.25	2.12121	4.56026	2.61438	2.26537	1.33333
	0	0	0	0	0	0	0	0	0	0	0.257732	0	0	0	0	0	0	0
	0.657895	0	0	0.884956	0	0	0.328947	0	0	0	1.03093	0.307692	0	0	0	0	0	0
	0	0	5.14469	0.589971	1.91257	0.309598	0.328947	0.277008	0	1.63399	0	0	0	0	0	0	0	0.666667
	1.31579	3.79009	1.92926	2.0649	1.36612	3.40557	1.64474	2.49307	1.29032	0.980392	2.06186	1.53846	2.5	0.606061	0.651466	1.63399	2.589	1
	0.328947	1.45773	1.28617	0.294985	0.273224	0	0.328947	0.831025	0.322581	0	0.515464	0.307692	0.3125	0	1.30293	0.653595	1.61812	0.666667
	1.64474	1.74927	2.2508	5.60472	1.63934	0.928793	2.63158	0.554017	0	0	0	0	0	0	0	0	0	0
	0.328947	0.291545	0.643087	0.589971	0.273224	0	0	0	0	0	0.257732	0	0	0	0	0	0.323625	0
	1.31579	2.91545	2.89389	1.17994	1.0929	0	0.986842	2.77008	0.645161	0	1.03093	1.23077	0	0.30303	0.325733	0	0	0.333333
	0.657895	0.874636	0.643087	0.294985	0.546448	0	0.657895	0	0	0	0.257732	0	0	0	0	0	0.323625	0
	1.31579	0.291545	0	0.884956	2.45902	2.47678	2.96053	3.3241	5.80645	5.55556	3.35052	4.61538	1.5625	6.06061	6.18893	2.94118	3.8835	4.33333
	0	0	0	0	1.91257	0.928793	0.657895	1.10803	0.967742	2.61438	1.80412	3.38462	1.5625	3.33333	2.28013	1.63399	2.91262	2.66667
	0	2.62391	0.96463	1.17994	1.0929	0	1.64474	0.277008	0.967742	0	1.54639	0.307692	0	0	0	0	0	0.333333
	0	0	0	0	0	0	0	0	0	0	0	0	0	0.30303	0	0.326797	0	0
	0	0	0.96463	0	0.273224	0.309598	0	0	0	0	0	0	0	0	0	0	0	0
	0.328947	0.291545	1.28617	1.47493	0.546448	0.928793	1.64474	0.277008	0	0	0	0	0	0	0	0	0	0
	0.328947	0.874636	0	0.884956	0.273224	0	0.328947	1.10803	0	0	0	0	0	0.606061	0	0	0	0
	0	0	0.643087	0	0	0	0	0	0	0	0.257732	0	0	0	0	0	0.323625	0
	0	0	0	0	0	0	0	0	0	0	0.257732	0.615385	0	0.30303	0.325733	0	0	0.333333
	0	0	0	0	0	0	0	0	0	0	0.257732	0.307692	0	0.606061	1.30293	0.326797	0.323625	0.333333
	0	0	0	0.589971	0.273224	0	0.328947	0	0.322581	0	0	0	0	0	0	0	0	0
	0	0	0	0	0	0	0	0.277008	0	0	0.257732	0	0	0	0.651466	0	0	0
	2.96053	0.874636	6.10932	0	1.0929	4.64396	1.97368	0.277008	0	0.980392	1.03093	0.615385	1.5625	1.21212	0.325733	0.653595	0.970874	1.66667
	0	0	0	0	0	0	0.328947	0	0	0	0	0	0	0	0	0	0	0
	0	0.291545	0.643087	0	0.273224	0	0	0	0	0	0	0.307692	0	0	0	0	0	0
	0	0	0	0	0	0	0	0	0.322581	0.326797	0.515464	1.53846	0	0.606061	1.62866	0.326797	0	0
	0.328947	0.874636	0.321543	0	0.273224	0.309598	0.657895	2.49307	0	0	0	0	0	0	0	0	0	0.333333
	0	0	0	0	0	0	0	0	0	0	0	0.923077	0	0	0	0	0	13
	0.328947	0	0.96463	0	0.273224	0	0	0	0	0	0	0	0	0	0	0	0	0
	2.63158	2.04082	2.89389	1.17994	1.0929	0.309598	1.97368	2.49307	0.967742	0.326797	1.28866	0.923077	0.3125	0.606061	0.325733	0.326797	0.647249	0.333333
	0	0	0	0	0	0	0	0.277008	0	0.326797	0	0	0	0	0	0	0	0
	0	0.291545	0.643087	0.294985	0	0	0	0	0.645161	0	0	0	0	0	0	0.326797	0	0.333333
	0	0	0	0	0.273224	0	0	0	0	0	0	0	0	0	0	0	0	0.333333
	9.21053	6.41399	7.71704	2.65487	7.10383	7.12074	5.26316	2.21607	4.83871	6.20915	6.4433	5.84615	4.6875	6.36364	4.56026	7.51634	8.09061	4.33333
	1.64474	2.33236	2.2508	1.76991	4.09836	3.71517	2.30263	0.277008	0.322581	1.63399	1.80412	0.923077	1.5625	1.81818	0.325733	1.63399	1.2945	1.33333
	4.60526	2.04082	2.57235	1.17994	1.36612	0.309598	3.28947	2.77008	2.25806	0.980392	2.06186	2.46154	0.625	0.909091	0.651466	0.653595	0.970874	0.666667
	0	0	0	0	0.546448	0	0.328947	0.831025	0	0.653595	0	0.307692	0	0.30303	0.325733	0.653595	0.323625	0
	0.657895	1.16618	1.60772	2.65487	1.0929	0	2.30263	2.21607	1.29032	0.653595	1.28866	1.84615	0	0.909091	0.325733	0.653595	0.323625	0.333333
	6.57895	2.91545	0.321543	0.884956	0.546448	0	0	2.49307	0.967742	0	0	0	0	0	0	0	0	0
	0.328947	0.874636	0	0	0.546448	0	0	0.554017	0	0	0	0	0	0	0	0	0.323625	0
	2.30263	2.91545	0.321543	1.17994	1.0929	0	0.657895	0.831025	0.322581	0	0.257732	0.307692	0	0	0	0	0.323625	0
	0	0	0	0	0	0	0.328947	0.831025	2.25806	4.57516	1.80412	4.30769	4.6875	3.33333	2.60586	6.53595	6.47249	6.33333
	0	0.291545	0	0.294985	0.273224	0.928793	1.31579	0	0	0	0	0	0	0	0	0	0	0
	0	0	0	0	0	0	0	0.277008	0	0	1.03093	0.923077	0	0.606061	0.651466	1.30719	0.970874	0
	0	0	0	0	0	0	0	0	0	0	0	0	0.3125	0.30303	0	0	0.323625	0.333333
	0	0	0	0	0	0	0	0.554017	0	0.326797	0.257732	1.23077	0	0	0.325733	0.980392	0	0.333333
	3.94737	7.58017	3.21543	4.42478	2.18579	0.309598	0.328947	1.10803	0	0	1.03093	0.307692	0	0.606061	0	0	0.323625	0
	0.328947	0	0	0.294985	0.273224	0	0.328947	0.277008	0.322581	0	0.257732	0.307692	0	0.30303	0	0	0	0.333333
	0	0	0	0	0	0	0.328947	0	0	0	0	0.307692	0	0	0	0	0	0
	0	0.291545	0	0	0.273224	0	0	0.554017	0	1.30719	0.257732	1.23077	0	0.30303	0.651466	0.980392	0.323625	1
	3.61842	3.49854	0.321543	7.9646	3.00546	0	0.986842	0.831025	0	0	0.515464	0	0	0	0	0	0	0
	0	0	0	0	0	0	0	0	0.322581	0.980392	0.515464	0.307692	0.625	1.51515	0.651466	1.63399	2.589	0
	0	0	0	0	0	0	0	0	0	0.326797	0.257732	0	0.625	0	1.30293	0	0.323625	8
	0	0.291545	0	0	0	0	0	0	0	0	0.257732	0.307692	0	0	0	0	0	0
	0	0	0	0	0	0	0.328947	0	0	0	0	0	0	0	0	0	0	0
	0	0	0	0	0	0.309598	0.328947	0	0	0	0	0	0	0	0.325733	0	0	0
	0.328947	0.874636	0.643087	0	0	0.928793	0.328947	0.831025	0	0	0.257732	0	0	0	0	0.326797	0.970874	0
	0.328947	0.291545	0.321543	0.294985	0.546448	0	0.328947	0.277008	0.322581	0	0.257732	0.307692	0.3125	0.30303	0	0.326797	0	0.333333
	2.63158	0.58309	2.89389	0.589971	8.19672	27.5542	1.97368	0.831025	6.45161	16.9935	0.515464	17.2308	49.0625	16.9697	21.1726	26.4706	19.7411	7.66667
	0.328947	0.874636	1.28617	2.0649	1.0929	0	1.31579	0.277008	1.29032	0	1.03093	0.307692	0	0.30303	0.325733	0	1.2945	0
	1.31579	3.207	3.53698	5.60472	3.55191	1.54799	4.27632	4.15512	4.51613	0.326797	3.09278	1.23077	0.625	0.606061	1.30293	0	0.647249	0
	0.657895	1.74927	0.321543	4.12979	0.546448	0	0.328947	0.277008	0	0.326797	1.03093	0	0	0.30303	0.325733	0	0	0.333333
	5.92105	11.6618	0	7.07965	7.37705	10.2167	5.92105	8.31025	8.06452	17.3203	13.6598	4.30769	5	7.57576	7.16612	5.88235	4.85437	4
	0.986842	1.45773	0	0.294985	1.0929	2.47678	3.28947	3.3241	1.6129	4.57516	6.18557	3.38462	5	6.06061	5.86319	7.51634	5.82524	8
	0	0	0	0	1.0929	2.16718	5.59211	2.49307	3.54839	2.28758	2.31959	5.23077	2.1875	6.9697	3.90879	3.26797	4.20712	4.33333
	0.657895	0	0	0	0.819672	0.619195	0	0.277008	0.322581	0	0	0	0	0	0	0	0	0
