# Supplementary material for: Albian to Turonian agglutinated foraminiferal assemblages of the Lower Saxony Cretaceous sub-basins – implications for sequence stratigraphy and paleoenvironmental interpretation
Source: Copernicus journal article supplement (doi:10.5194/fr-24-395-2021), 2021-12-17
Supplement: Supplementary file 4 [file table s4.xlsx]

## Sheet: Söhlde-Loges section
Söhlde-Loges quarry section
section m	35	33	31	28	24	21	18	15.5	14	9.5	3.5	1.5	-0.5
Agathamminoides serpens	0	2	0	0	0	0	1	0	1	0	0	0	1
Ammobaculites agglutinans	23	18	17	21	21	9	24	21	27	13	6	0	2
Ammobaculites sp.	0	0	0	0	0	0	0	0	0	0	0	0	2
Ammodiscus cretaceus	5	4	12	13	6	6	10	16	8	8	7	2	3
Ammodiscus glabratus	4	3	11	9	8	11	3	10	3	9	4	5	5
Ammodiscus peruvianus	3	5	9	3	0	2	3	2	0	0	0	0	5
Ammodiscus tenuissimus	0	1	3	2	1	0	1	2	1	0	1	0	4
Ammolagena clavata	2	1	3	4	3	3	0	1	0	0	0	0	11
Ammolagena contorta	78	20	35	37	43	50	61	72	87	43	110	1	27
Ammosphaeroidina pseudopauciloculata	8	7	7	11	1	0	1	3	0	0	0	0	0
Arenobulimina barnardi	0	6	0	4	0	1	0	0	0	4	0	0	0
Arenobulimina bochumensis	0	11	9	7	6	6	15	3	8	7	2	0	0
Arenobulimina preslii	0	7	1	11	3	11	8	13	6	11	4	0	0
Arenobulimina spp.	0	2	2	0	1	0	7	2	6	1	4	0	4
Arenobulimina truncata	0	20	2	16	4	24	15	17	8	20	6	0	0
Ataxophragmium depressum	0	2	0	0	0	1	0	0	0	1	0	0	0
Ataxophragmium sp.	0	0	1	0	0	0	1	0	1	0	0	0	0
Bathysiphon spp.	9	10	11	14	7	21	6	22	8	10	2	0	11
Bicazammina lagenaria	4	0	1	0	11	0	3	0	4	3	1	1	1
Bulbobaculites problematicus	22	38	20	45	54	70	37	45	19	88	69	237	2
Caudammina ovula	0	10	2	5	1	13	1	8	3	14	2	4	0
Caudammina sp.	4	0	0	0	5	0	4	0	3	2	0	0	6
Clavulinoides sp.	1	0	0	0	2	0	1	0	0	0	0	0	0
Dolgenia pennyi	2	0	2	7	7	6	1	2	4	0	0	0	2
Eggerellina brevis	3	1	6	1	1	5	19	0	14	0	0	14	28
Eggerellina mariae	0	2	0	4	2	6	1	2	2	0	0	26	6
Eobigenerina kuhnti	1	1	1	1	0	1	1	0	1	6	4	0	0
Eobigenerina variabilis	6	10	7	4	5	5	10	7	2	8	13	23	1
Gaudryina sp. 1	0	0	0	0	0	0	0	0	0	0	0	0	7
Gaudryinella irregularis	7	7	5	6	1	3	6	1	3	0	0	0	0
Gaudryinopsis filiformis	0	0	0	0	0	0	0	0	0	0	0	10	3
Gerochammina stanislawi	2	16	11	8	22	22	29	9	13	14	15	2	5
Glomospira diffundens	1	0	0	0	0	4	0	0	0	2	1	0	1
Glomospira gordialis	3	12	1	1	4	5	7	1	2	7	16	3	9
Glomospira irregularis	1	3	0	1	3	5	8	6	6	5	1	0	0
Hagenowella elevata	0	13	2	8	8	5	24	7	6	6	5	0	4
Hagenowella obesa	0	2	0	6	0	0	0	2	0	4	1	0	1
Haplophragmoides aff. bubiki	0	1	3	1	0	1	0	0	0	1	5	8	0
Haplophragmoides eggeri	1	0	1	0	0	1	0	3	8	2	1	3	0
Haplophragmoides spp.	3	0	5	0	8	0	2	0	6	0	1	0	2
Haplophragmoides stomatus	0	1	0	0	0	3	0	0	0	0	0	0	0
Haplophragmoides suborbicularis	1	1	0	0	0	0	1	1	0	0	0	0	0
Haplophragmoides walteri	0	0	0	0	0	0	0	4	2	3	1	0	7
Hemisphaerammina batalleri	0	0	1	0	2	0	2	1	0	0	0	0	0
Hemisphaerammina glandiformis	0	0	1	0	0	0	0	0	0	0	0	0	0
Hyperammina sp.	4	0	0	1	0	0	0	0	0	0	0	0	1
Kadriayina gradata	0	0	0	0	0	0	0	0	0	0	0	0	4
Kechenotiske sp.	0	0	0	0	0	1	0	0	0	0	0	0	0
Lagenammina difflugiformis	0	0	0	1	1	0	0	0	0	0	0	0	0
Lituotuba lituiformis	1	8	0	3	1	7	1	1	3	1	5	0	0
Marssonella trochus	0	0	0	0	0	0	0	0	2	0	0	0	1
Nothia spp.	0	1	0	3	1	2	0	4	0	2	1	0	1
Parvigenerina sp. 3	3	3	8	7	14	6	31	8	4	3	5	0	1
Placentammina cf. placenta	1	3	1	0	2	0	6	0	0	2	0	0	1
Placopsilina sp.	0	0	0	0	0	0	0	0	0	0	0	0	1
Plectina cenomana	0	0	0	0	0	0	0	0	0	0	0	0	15
Plectina mariae	0	0	0	0	0	0	0	0	0	0	0	0	2
Praecystammina sp.	0	0	0	0	0	0	0	0	2	0	0	0	0
Psammosiphonella spp.	21	6	9	10	9	9	5	15	13	10	1	2	15
Psammosphaera fusca	0	0	2	0	0	0	1	0	0	2	0	0	0
Psammosphaera irregularis	8	4	17	10	8	1	4	3	8	1	2	0	8
Pseudonodosinella nodulosa	0	0	0	0	0	3	7	4	4	14	27	0	13
Pseudonodosinella parvula	3	0	3	1	1	6	4	3	6	4	20	0	2
Pseudonodosinella troyeri	0	0	0	0	0	0	0	0	0	0	0	0	9
Pseudotextulariella cretosa	0	0	0	0	0	0	0	0	0	0	0	0	1
Rectogerochammina eugubina	0	11	1	5	7	4	8	2	6	3	7	0	1
Recurvoides sp.	0	0	0	0	0	0	0	3	0	0	2	0	0
Reophax subfusiformis	0	0	0	1	0	0	0	1	0	0	0	0	0
Repmanina charoides	4	8	2	5	9	7	31	5	3	9	24	30	27
Rhabdammina sp.	3	1	4	1	0	2	1	1	1	1	0	0	0
Rzehakina minima	0	0	0	0	0	0	0	0	0	0	0	0	1
Saccammina grzybowskii	21	1	14	5	12	0	12	3	10	1	0	0	2
Saccammina sphaerica	1	0	2	0	0	0	0	0	0	0	0	0	0
Spiroplectammina navarroana	25	88	17	33	23	44	14	12	1	55	12	13	1
Spiroplectammina sp.	3	0	4	0	0	0	1	0	0	0	0	0	0
Textulariopsis sp.	0	0	0	0	1	0	0	0	0	0	0	0	0
Tipeammina elliptica	5	0	7	0	0	1	0	0	0	0	1	0	0
Tipeammina sp. 1	6	1	10	5	2	2	2	0	4	0	5	0	1
Tolypammina sp.	0	1	0	1	0	2	0	1	0	1	1	1	0
Tritaxia tricarinata	0	1	0	0	0	0	7	0	1	3	0	0	2
Trochammina spp.	13	6	15	7	8	5	26	3	8	2	0	17	14
Trochamminoides spp.	9	8	21	6	21	5	22	3	10	2	2	4	12
Uvigerinammina jankoi	6	0	4	0	1	0	2	0	4	0	0	0	0
Verneuilinoides spp.	7	6	19	11	0	5	3	5	4	6	16	10	0
Vialovella frankei	0	0	0	0	0	0	0	0	0	0	0	0	38
Voloshinoides anglicus	0	0	0	0	0	0	0	0	0	0	0	0	5
Counted specimens	338	394	352	366	361	412	501	360	356	414	413	416	339
Fisher-Alpha Index	13.07	14.75	15.92	14.34	13.99	13.67	14.97	14.44	14.95	13.24	11.69	4.665	17.62
Species richness	42	48	51	48	47	46	52	46	48	45	42	21	53
Morphogroup in %
M1	9.8	4.8	6.8	7.9	4.7	8.7	2.4	11.9	6.2	5.8	1.2	0.7	8
M2a	13	4.6	13.1	6	8.6	3.9	6	4.2	6.7	5.3	1.2	1	5.3
M2b	3.8	2	4.5	1.9	2.2	1.5	5.4	0.8	2.5	0.7	0	4.1	4.1
M2c	8.3	22.3	6	9	6.6	10.7	3	3.3	0.3	13.3	2.9	3.1	0.3
M3a	8.6	9.9	14.5	12.6	11.1	11.7	13.4	12.2	9	9.7	14.3	9.6	17.4
M3b	24	7.4	10.8	12	13	14.6	12.4	20.6	25.3	10.6	27.8	0.2	11.5
M3c	5	3.8	8	4.6	6.1	1.2	4.6	2.5	3.4	0.5	1	1	3.5
M4a	1.5	0.8	2.6	0.3	2.2	1.2	0.6	2.2	4.5	1.4	1.9	2.6	2.7
M4b	26	44.4	33.8	45.6	45.4	46.6	52.3	42.2	42.1	52.7	49.6	77.6	47.2
Relative abundances in %
Agathamminoides serpens	0	0.507614	0	0	0	0	0.199601	0	0.280899	0	0	0	0.294985
Ammobaculites agglutinans	6.80473	4.56853	4.82955	5.7377	5.81717	2.18447	4.79042	5.83333	7.58427	3.1401	1.45278	0	0.589971
Ammobaculites sp.	0	0	0	0	0	0	0	0	0	0	0	0	0.589971
Ammodiscus cretaceus	1.47929	1.01523	3.40909	3.55191	1.66205	1.45631	1.99601	4.44444	2.24719	1.93237	1.69492	0.480769	0.884956
Ammodiscus glabratus	1.18343	0.761421	3.125	2.45902	2.21607	2.6699	0.598802	2.77778	0.842697	2.17391	0.968523	1.20192	1.47493
Ammodiscus peruvianus	0.887574	1.26904	2.55682	0.819672	0	0.485437	0.598802	0.555556	0	0	0	0	1.47493
Ammodiscus tenuissimus	0	0.253807	0.852273	0.546448	0.277008	0	0.199601	0.555556	0.280899	0	0.242131	0	1.17994
Ammolagena clavata	0.591716	0.253807	0.852273	1.0929	0.831025	0.728155	0	0.277778	0	0	0	0	3.24484
Ammolagena contorta	23.0769	5.07614	9.94318	10.1093	11.9114	12.1359	12.1756	20	24.4382	10.3865	26.6344	0.240385	7.9646
Ammosphaeroidina pseudopauciloculata	2.36686	1.77665	1.98864	3.00546	0.277008	0	0.199601	0.833333	0	0	0	0	0
Arenobulimina barnardi	0	1.52284	0	1.0929	0	0.242718	0	0	0	0.966184	0	0	0
Arenobulimina bochumensis	0	2.79188	2.55682	1.91257	1.66205	1.45631	2.99401	0.833333	2.24719	1.69082	0.484262	0	0
Arenobulimina preslii	0	1.77665	0.284091	3.00546	0.831025	2.6699	1.59681	3.61111	1.68539	2.657	0.968523	0	0
Arenobulimina spp.	0	0.507614	0.568182	0	0.277008	0	1.39721	0.555556	1.68539	0.241546	0.968523	0	1.17994
Arenobulimina truncata	0	5.07614	0.568182	4.37158	1.10803	5.82524	2.99401	4.72222	2.24719	4.83092	1.45278	0	0
Ataxophragmium depressum	0	0.507614	0	0	0	0.242718	0	0	0	0.241546	0	0	0
Ataxophragmium sp.	0	0	0.284091	0	0	0	0.199601	0	0.280899	0	0	0	0
Bathysiphon spp.	2.66272	2.53807	3.125	3.82514	1.93906	5.09709	1.1976	6.11111	2.24719	2.41546	0.484262	0	3.24484
Bicazammina lagenaria	1.18343	0	0.284091	0	3.04709	0	0.598802	0	1.1236	0.724638	0.242131	0.240385	0.294985
Bulbobaculites problematicus	6.50888	9.64467	5.68182	12.2951	14.9584	16.9903	7.38523	12.5	5.33708	21.256	16.707	56.9712	0.589971
Caudammina ovula	0	2.53807	0.568182	1.36612	0.277008	3.15534	0.199601	2.22222	0.842697	3.38164	0.484262	0.961538	0
Caudammina sp.	1.18343	0	0	0	1.38504	0	0.798403	0	0.842697	0.483092	0	0	1.76991
Clavulinoides sp.	0.295858	0	0	0	0.554017	0	0.199601	0	0	0	0	0	0
Dolgenia pennyi	0.591716	0	0.568182	1.91257	1.93906	1.45631	0.199601	0.555556	1.1236	0	0	0	0.589971
Eggerellina brevis	0.887574	0.253807	1.70455	0.273224	0.277008	1.21359	3.79242	0	3.93258	0	0	3.36538	8.25959
Eggerellina mariae	0	0.507614	0	1.0929	0.554017	1.45631	0.199601	0.555556	0.561798	0	0	6.25	1.76991
Eobigenerina kuhnti	0.295858	0.253807	0.284091	0.273224	0	0.242718	0.199601	0	0.280899	1.44928	0.968523	0	0
Eobigenerina variabilis	1.77515	2.53807	1.98864	1.0929	1.38504	1.21359	1.99601	1.94444	0.561798	1.93237	3.1477	5.52885	0.294985
Gaudryina sp. 1	0	0	0	0	0	0	0	0	0	0	0	0	2.0649
Gaudryinella irregularis	2.07101	1.77665	1.42045	1.63934	0.277008	0.728155	1.1976	0.277778	0.842697	0	0	0	0
Gaudryinopsis filiformis	0	0	0	0	0	0	0	0	0	0	0	2.40385	0.884956
Gerochammina stanislawi	0.591716	4.06091	3.125	2.18579	6.09418	5.33981	5.78842	2.5	3.65169	3.38164	3.63196	0.480769	1.47493
Glomospira diffundens	0.295858	0	0	0	0	0.970874	0	0	0	0.483092	0.242131	0	0.294985
Glomospira gordialis	0.887574	3.04569	0.284091	0.273224	1.10803	1.21359	1.39721	0.277778	0.561798	1.69082	3.87409	0.721154	2.65487
Glomospira irregularis	0.295858	0.761421	0	0.273224	0.831025	1.21359	1.59681	1.66667	1.68539	1.20773	0.242131	0	0
Hagenowella elevata	0	3.29949	0.568182	2.18579	2.21607	1.21359	4.79042	1.94444	1.68539	1.44928	1.21065	0	1.17994
Hagenowella obesa	0	0.507614	0	1.63934	0	0	0	0.555556	0	0.966184	0.242131	0	0.294985
Haplophragmoides aff. bubiki	0	0.253807	0.852273	0.273224	0	0.242718	0	0	0	0.241546	1.21065	1.92308	0
Haplophragmoides eggeri	0.295858	0	0.284091	0	0	0.242718	0	0.833333	2.24719	0.483092	0.242131	0.721154	0
Haplophragmoides spp.	0.887574	0	1.42045	0	2.21607	0	0.399202	0	1.68539	0	0.242131	0	0.589971
Haplophragmoides stomatus	0	0.253807	0	0	0	0.728155	0	0	0	0	0	0	0
Haplophragmoides suborbicularis	0.295858	0.253807	0	0	0	0	0.199601	0.277778	0	0	0	0	0
Haplophragmoides walteri	0	0	0	0	0	0	0	1.11111	0.561798	0.724638	0.242131	0	2.0649
Hemisphaerammina batalleri	0	0	0.284091	0	0.554017	0	0.399202	0.277778	0	0	0	0	0
Hemisphaerammina glandiformis	0	0	0.284091	0	0	0	0	0	0	0	0	0	0
Hyperammina sp.	1.18343	0	0	0.273224	0	0	0	0	0	0	0	0	0.294985
Kadriayina gradata	0	0	0	0	0	0	0	0	0	0	0	0	1.17994
Kechenotiske sp.	0	0	0	0	0	0.242718	0	0	0	0	0	0	0
Lagenammina difflugiformis	0	0	0	0.273224	0.277008	0	0	0	0	0	0	0	0
Lituotuba lituiformis	0.295858	2.03046	0	0.819672	0.277008	1.69903	0.199601	0.277778	0.842697	0.241546	1.21065	0	0
Marssonella trochus	0	0	0	0	0	0	0	0	0.561798	0	0	0	0.294985
Nothia spp.	0	0.253807	0	0.819672	0.277008	0.485437	0	1.11111	0	0.483092	0.242131	0	0.294985
Parvigenerina sp. 3	0.887574	0.761421	2.27273	1.91257	3.87812	1.45631	6.18762	2.22222	1.1236	0.724638	1.21065	0	0.294985
Placentammina cf. placenta	0.295858	0.761421	0.284091	0	0.554017	0	1.1976	0	0	0.483092	0	0	0.294985
Placopsilina sp.	0	0	0	0	0	0	0	0	0	0	0	0	0.294985
Plectina cenomana	0	0	0	0	0	0	0	0	0	0	0	0	4.42478
Plectina mariae	0	0	0	0	0	0	0	0	0	0	0	0	0.589971
Praecystammina sp.	0	0	0	0	0	0	0	0	0.561798	0	0	0	0
Psammosiphonella spp.	6.21302	1.52284	2.55682	2.73224	2.49307	2.18447	0.998004	4.16667	3.65169	2.41546	0.242131	0.480769	4.42478
Psammosphaera fusca	0	0	0.568182	0	0	0	0.199601	0	0	0.483092	0	0	0
Psammosphaera irregularis	2.36686	1.01523	4.82955	2.73224	2.21607	0.242718	0.798403	0.833333	2.24719	0.241546	0.484262	0	2.35988
Pseudonodosinella nodulosa	0	0	0	0	0	0.728155	1.39721	1.11111	1.1236	3.38164	6.53753	0	3.83481
Pseudonodosinella parvula	0.887574	0	0.852273	0.273224	0.277008	1.45631	0.798403	0.833333	1.68539	0.966184	4.84262	0	0.589971
Pseudonodosinella troyeri	0	0	0	0	0	0	0	0	0	0	0	0	2.65487
Pseudotextulariella cretosa	0	0	0	0	0	0	0	0	0	0	0	0	0.294985
Rectogerochammina eugubina	0	2.79188	0.284091	1.36612	1.93906	0.970874	1.59681	0.555556	1.68539	0.724638	1.69492	0	0.294985
Recurvoides sp.	0	0	0	0	0	0	0	0.833333	0	0	0.484262	0	0
Reophax subfusiformis	0	0	0	0.273224	0	0	0	0.277778	0	0	0	0	0
Repmanina charoides	1.18343	2.03046	0.568182	1.36612	2.49307	1.69903	6.18762	1.38889	0.842697	2.17391	5.81114	7.21154	7.9646
Rhabdammina sp.	0.887574	0.253807	1.13636	0.273224	0	0.485437	0.199601	0.277778	0.280899	0.241546	0	0	0
Rzehakina minima	0	0	0	0	0	0	0	0	0	0	0	0	0.294985
Saccammina grzybowskii	6.21302	0.253807	3.97727	1.36612	3.3241	0	2.39521	0.833333	2.80899	0.241546	0	0	0.589971
Saccammina sphaerica	0.295858	0	0.568182	0	0	0	0	0	0	0	0	0	0
Spiroplectammina navarroana	7.39645	22.335	4.82955	9.01639	6.37119	10.6796	2.79441	3.33333	0.280899	13.285	2.90557	3.125	0.294985
Spiroplectammina sp.	0.887574	0	1.13636	0	0	0	0.199601	0	0	0	0	0	0
Textulariopsis sp.	0	0	0	0	0.277008	0	0	0	0	0	0	0	0
Tipeammina elliptica	1.47929	0	1.98864	0	0	0.242718	0	0	0	0	0.242131	0	0
Tipeammina sp. 1	1.77515	0.253807	2.84091	1.36612	0.554017	0.485437	0.399202	0	1.1236	0	1.21065	0	0.294985
Tolypammina sp.	0	0.253807	0	0.273224	0	0.485437	0	0.277778	0	0.241546	0.242131	0.240385	0
Tritaxia tricarinata	0	0.253807	0	0	0	0	1.39721	0	0.280899	0.724638	0	0	0.589971
Trochammina spp.	3.84615	1.52284	4.26136	1.91257	2.21607	1.21359	5.18962	0.833333	2.24719	0.483092	0	4.08654	4.12979
Trochamminoides spp.	2.66272	2.03046	5.96591	1.63934	5.81717	1.21359	4.39122	0.833333	2.80899	0.483092	0.484262	0.961538	3.53982
Uvigerinammina jankoi	1.77515	0	1.13636	0	0.277008	0	0.399202	0	1.1236	0	0	0	0
Verneuilinoides spp.	2.07101	1.52284	5.39773	3.00546	0	1.21359	0.598802	1.38889	1.1236	1.44928	3.87409	2.40385	0
Vialovella frankei	0	0	0	0	0	0	0	0	0	0	0	0	11.2094
Voloshinoides anglicus	0	0	0	0	0	0	0	0	0	0	0	0	1.47493
