# Supplementary material for: Albian to Turonian agglutinated foraminiferal assemblages of the Lower Saxony Cretaceous sub-basins – implications for sequence stratigraphy and paleoenvironmental interpretation
Source: Copernicus journal article supplement (doi:10.5194/fr-24-395-2021), 2021-12-17
Supplement: Supplementary file [file fr-24-395-2021-supplement-title-page.pdf › fr-24-395-2021-supplement-title-page.pdf]

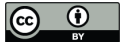

*Supplement of*

**Albian to Turonian agglutinated foraminiferal assemblages of the Lower Saxony Cretaceous sub-basins – implications for sequence stratigraphy and paleoenvironmental interpretation**

**Richard M. Besen et al.**

*Correspondence to:* Richard M. Besen (r.besen@fu-berlin.de)

- fr-24-395-2021-supplement-title-page.pdf
- FR Besen et al. Supplements
  - table S1.xlsx
  - table s2.xlsx
  - table s3.xlsx
  - table s4.xlsx

The copyright of individual parts of the supplement might differ from the article licence.
